# Supplementary material for: GABAB receptor auxiliary subunits modulate Cav2.3-mediated release from medial habenula terminals
Source: eLife. 2021 Apr 29;10:e68274. doi: 10.7554/eLife.68274 (PMC8121548; doi:10.7554/eLife.68274)
Supplement: Figure 1—figure supplement 1—source data 1. [file elife-68274-fig1-figsupp1-data1.xlsx]

## Sheet: Sheet1
	Panel A						Panel D
	Rise Time (ms)		FWHM (ms)				Time (min)	EPSC Amplitude (pA)
	ACSF	SNX-482	ACSF	SNX-482			0.333333	-157.4
	0.83	0.91	1.21	1			0.5	-182.395
	0.83	1.07	1.06	1.1			0.666667	-161.569
	0.92	0.83	0.98	1.01			0.833333	-165.82
		0.91		1.12			1	-154.415
							1.16667	-155.258
							1.33333	-136.288
							1.5	-147.581
							1.66667	-137.366
							1.83333	-171.488
							2
							2.16667	-136.24
							2.33333	-134.893
							2.5	-169.656
							2.66667	-171.991
							2.83333	-110.527
							3	-98.5497
							3.16667	-98.6217
							3.33333	-123.915
							3.5	-86.6211
							3.66667	-130.407
							3.83333	-97.771
							4	-117.216
							4.16667	-124.221
							4.33333	-123.954
							4.5	-123.571
							4.66667	-95.5
							4.83333	-138.379
							5	-98.9002
							5.16667	-121.69
							5.33333
							5.5	-63.3736
							5.66667	-124.425
							5.83333	-110.364
							6	-109.748
							6.16667	-144.471
							6.33333	-122.091
							6.5	-119.308
							6.66667	-100.043
							6.83333	-141.731
							7	-139.315
							7.16667	-156.532
							7.33333	-90.4858
							7.5	-105.256
							7.66667	-115.466
							7.83333	-125.648
							8	-107.86
							8.16667	-107.411
							8.33333	-133.619
							8.5	-109.933
							8.66667	-155.778
							8.83333	-126.728
							9	-144.211
							9.16667	-174.218
							9.33333	-117.818
							9.5	-132.606
							9.66667	-142.505
							9.83333	-146.37
							10	-175.803
							10.1667	-141.212
							10.3333	-167.266
							10.5	-201.976
							10.6667	-155.652
							10.8333	-155.409
							11	-141.801
							11.1667	-144.092
							11.3333	-148.722
							11.5	-176.142
							11.6667	-136.222
							11.8333	-164.965
							12	-173.496
							12.1667	-152.95
							12.3333	-145.228
							12.5	-147.927
							12.6667	-150.802
							12.8333	-145.064
							13	-172.457
							13.1667	-144.973
							13.3333	-235.421
							13.5	-159.614
							13.6667	-179.18
							13.8333	-129.627
							14	-158.091
							14.1667	-203.687
							14.3333	-177.753
							14.5	-151.776
							14.6667	-194.543
							14.8333	-170.688
							15	-204.822
							15.1667	-114.084
							15.3333	-177.572
							15.5	-124.221
							15.6667	-184.481
							15.8333
							16
							16.1667	-138.159
							16.3333	-135.154
							16.5	-105.245
							16.6667	-103.089
							16.8333	-134.532
							17	-89.4051
							17.1667	-108.119
							17.3333	-112.506
							17.5	-106.727
							17.6667	-184.856
							17.8333	-132.775
							18	-132.86
							18.1667	-169.806
							18.3333	-149.031
							18.5	-118.695
							18.6667	-133.344
							18.8333	-188.772
							19	-103.69
							19.1667	-162.511
							19.3333	-166.112
							19.5	-147.715
							19.6667	-129.496
							19.8333
							20
							20.1667	-156.451
							20.3333	-145.199
							20.5	-162.683
							20.6667	-155.437
							20.8333	-173.162
							21	-133.369
							21.1667	-139.593
							21.3333	-131.614
							21.5	-147.875
							21.6667	-146.058
							21.8333	-108.587
							22	-126.857
							22.1667	-130.55
							22.3333	-164.349
							22.5	-249.177
							22.6667	-155.46
							22.8333	-225.288
							23	-211.12
							23.1667	-183.77
							23.3333	-236.94
							23.5	-174.711
							23.6667	-120.312
							23.8333	-172.139
							24	-171.935
							24.1667	-145.758
							24.3333	-212.526
							24.5	-156
							24.6667	-164.462
							24.8333	-194.461
							25	-148.357
							25.1667	-200.642
							25.3333	-195.968
							25.5	-190.825
							25.6667	-209.208
							25.8333	-136.881
							26	-153.301
							26.1667	-183.05
							26.3333	-213.286
							26.5	-187.862
							26.6667	-172.496
							26.8333	-153.219
							27	-179.754
							27.1667	-207.028
							27.3333	-159.857
							27.5	-143.928
							27.6667	-181.542
							27.8333	-153.648
							28	-175.851
							28.1667	-206.321
							28.3333	-189.205
							28.5	-171.779
							28.6667	-289.38
							28.8333	-237.574
							29	-179.364
							29.1667	-176.877
							29.3333	-199.108
							29.5	-230.106
							29.6667	-156.479
							29.8333	-164.716
							30	-195.486
							30.1667	-195.781
							30.3333	-222.079
							30.5	-219.086
							30.6667	-152.305
							30.8333	-192.265
