# Supplementary material for: GABAB receptor auxiliary subunits modulate Cav2.3-mediated release from medial habenula terminals
Source: eLife. 2021 Apr 29;10:e68274. doi: 10.7554/eLife.68274 (PMC8121548; doi:10.7554/eLife.68274)
Supplement: Figure 1—source data 1. [file elife-68274-fig1-data1.xlsx]

## Sheet: Sheet1
		Panel C
		Mouse1	Mouse2	Mouse3		Mouse4		Mouse5	Mouse6	Mouse7	Mouse8			Mouse9
	Time (min)	Cell1	Cell2	Cell3	Cell4	Cell5	Cell6	Cell7	Cell8	Cell9	Cell10	Cell11	Cell12	Cell13		Average	SEM
	1			43.1572		167.772			93.7483	103.383	101.805	128.262	101.782	58.4273		99.7922	13.6328
	2		100.153	185.33	114.635	47.9193	91.2772	77.6619	96.6507	115.48	102.692	105.956	101.494	91.7661		102.585	9.15619
	3	35.0228	62.2948	89.7943	120.977	103.755	100.582	121.661	104.217	95.1785	95.3275	123.891	109.341	108.874		97.7627	6.8902
	4	109.034	129.817	85.5668	76.4372	82.3785	94.2502	91.6931	108.751	87.9857	113.431	108.9	87.9752	122.044		99.8664	4.56968
	5	155.944	107.735	96.1516	87.9518	98.1753	113.891	108.984	96.6331	97.9733	125.987	59.2288	91.2791	118.888		104.525	6.27685
	6	743.257	113.781	123.08	83.7994	140.615	291.74	105.666	89.0832	372.781	165.308	447.385	200.98	162.478		233.843	52.7391
	7	844.744	162.224	187.545	155.347	265.987	336.895	89.1432	180.213	1987.69	860.5	875.901	241.435	392.791		506.186	146.85
	8	900.097	123.7	288.913	163.411	739.552	399.084	311.366	235.369	1958.11	1165.01	1069.69	259.472	388.052		615.525	148.118
	9	1093.86	252.579	318.326	207.748	794.253	356.923	330.454	237.781	1221.39	527.919	499.039	238.841	219.437		484.504	94.7954
	10	1124.29	389.098	214.056	220.279	1132.52	343.088	450.971	166.26	386.344	110.075	570.703	176.008	157.687		418.567	94.9501
	11	940.46	428.71	207.902	197.112	741.473	401.529	419.775	159.828	150.641	80.7256	676.479	153.938	84.5841		357.166	76.8951
	12	958.662	288.284	197.583	249.847	577.008	334.333	405.062	135.319	162.253	53.2885	548.711	111.362	60.4825		314.015	71.3939
	13	827.789	279.996	156.862	217.121	266.795	329.699	448.049	121.638	124.112	84.4885	461.102	80.3264	88.0909		268.159	59.1257
	14	302.919	266.099	151.105	212.652	297.481	339.663	234.173	97.3537	149.637	97.6849	455.768	91.7746	83.3678		213.821	31.9734
	15	270.521	214.507	128.529	190.601	200.748	427.636	354.938	103.609	138.994	142.367	594.781	87.589	106.452		227.79	41.5824
	16	160.629	203.503		173.814	311.856	306.796	249.427	95.3376	150.447	148.354	725.846	82.7135	117.606		227.194	50.2169
	17	159.997	173.099		99.9141	231.999	308.596	306.224	87.7579	131.477	120.999	725.846	82.7135	126.11		212.894	51.7651
	18	135.298			98.3306	206.971	489.509	240.77	84.9633			621.924	80.239	167.104		236.123	64.0078
	Panel D
		Mouse1		Mouse2	Mouse3	Mouse4		Mouse5
	Time (min)	Cell1	Cell2	Cell3	Cell4	Cell5	Cell6	Cell7	Cell8	Cell9	Cell10		Average	SEM
	1		80.9161				107.16		104.816	104.495	97.2681		98.9311	4.79903
	2	86.0194	98.7565			107.938	99.5968	88.5709	108.841	99.1391	103.746		99.0759	2.91822
	3	104.183	134.278	108.195	98.9274	102.572	101.994	123.68	96.0121	99.65	101.652		107.114	3.86542
	4	105.401	99.8371	100.204	114.103	98.1915	97.7986	111.404	93.9541	103.309	104.307		102.851	1.97506
	5	104.397	86.2122	91.6008	86.9697	91.2987	93.4508	109.053	96.3772	93.407	93.027		94.5794	2.265
	6	71.9042	68.3345	45.8127	49.9267	66.9817	89.4167	73.1678	97.5483	103.897	89.9349		75.6924	6.12079
	7	61.2868	45.999	19.4639	35.1651	65.0483	77.8706	51.984	92.9009	90.8278	74.181		61.4727	7.51218
	8	45.7281	33.5137	48.9142	36.8243	63.4857	83.517	58.3048	87.1898	77.3814	76.5886		61.1448	6.17951
	9	66.8066	58.6229	91.0957	36.9946	62.826	87.6643	60.5777	84.2458	59.6842	86.1724		69.469	5.47152
	10	87.645	85.0765	112.488	53.6882	61.5514	104.48	74.8044	94.6781	76.1024	93.5354		84.4049	5.79119
	11	84.69	74.513		47.7347	79.3726	104.243	92.9587	99.867	82.1437	102.647		85.3522	5.89677
	12	63.068	69.6828		59.3856	88.1376	102.18	113.436	107.118	79.7168	96.1576		86.5426	6.56755
	13	90.0614	79.044		42.4484	85.5158	102.485	99.2189	102.443	106.068	95.8295		89.235	6.54462
	14		53.7949		46.5214	85.0974	93.7192	91.3068	104.045	94.8301	104.17		84.1856	7.78242
	15		68.1971		68.6025	89.0014	104.537		101.687	94.7484	90.5725		88.1923	5.52514
	16		56.8994			95.9883	106.645		97.2728	99.6659	88.7756		90.8744	7.1921
	17		49.9632			83.8103	101.525		91.9631	89.5123	95.8453		85.4365	7.49973
	18		114.787			73.0313	107.661		93.2309	85.1859	67.8079		90.2841	7.61555
	Panel F
		Mouse1	Mouse2	Mouse3	Mouse4	Mouse5	Mouse6	Mouse7	Mouse8	Mouse9
	Time (min)	Cell1	Cell2	Cell3	Cell4	Cell5	Cell6	Cell7	Cell8	Cell9
	1		96.6573	105.492	111.706	90.209		95.6478		104.783
	2	106.547	98.5021	94.9863	99.8897	91.2883	104.072	95.9258	93.4751	97.9102
	3	99.7052	106.943	99.3528	97.6551	105.519	97.0276	91.4331	106.082	92.9783
	4	92.3341	97.153	106.853	90.9414	120.966	88.0091	102.8	107.226	102.317
	5	84.5238	100.744	93.316	99.8076	92.0169	83.9453	114.193	93.2174	102.011
	6	102.446	103.858	83.0966	98.752	102.681	85.8575	113.193	90.7635	98.2798
	7	75.8103	107.848	86.5208	95.9444	98.2341	98.0498	103.316	73.7436	83.6917
	8	76.0052	94.9708	63.7971	81.6381	82.3619	92.1018	105.359	76.3624	58.8096
	9	66.0799	80.3238	53.1485	55.2099	73.1635	87.8043	92.6319	68.4775	57.5988
	10	59.3644	49.477	59.8529	46.407	61.3561	79.8284	77.2058	67.2471	43.9783
	11	62.2351	18.8473	42.2088	37.7324	56.2185	69.4726	92.1017	62.2418	34.0872
	12	52.5009	18.1948	48.3839	21.1646	56.9744	65.9094	78.0932	58.4597	31.6167
	13	62.9762	8.54093	35.9206	16.8343	48.8902	58.9079	48.4299	45.7337	29.5374
	14	62.9934	6.02468	30.1144	22.6758	48.7667	62.6376	39.8003	33.7963	20.1867
	15	51.5676	8.04713	31.5602	13.9015	50.4227	42.9143	21.9813	28.4723	24.78
	16	53.1266	3.76006	27.359	15.2864	48.4376	35.0839	25.2917	16.007	22.7847
	17	49.6741	0.330016	30.6309	15.2928	44.4228	26.2134	22.2422	10.3527	15.6364
	18	53.6611	1.9489	24.1026	6.99488	32.4212	38.1193		15.3631	14.6196
	19	41.7111		19.6997	15.8446	34.9387			7.90191	13.8954
	20	41.7111		19.6997	15.8446	34.9387			7.90191	13.8954
	21	58.971		21.1106	8.51256	31.1673			6.96271	14.147
	22	50.2101		11.1056	5.78548	21.1063			8.55903	8.62669
	23	40.7645		13.3841	7.12473	21.4856			6.72991	12.6484
	24	37.2721		1.99786	4.41491	25.1314			11.1273	11.4353
	25	29.6257			3.08524	24.0258			11.3889	8.28592
	26	37.2299			4.69417	20.5896			4.60656	10.8796
	27	30.0995			4.78729	18.3277			8.22298	5.81547
	28	28.0752			3.46272	23.6366			9.20907
	29	21.8707			3.01771	26.6127			9.20349	6.8301
	30	23.31			7.64015	29.0421				6.0022
	Panel G
		Mouse1		Mouse2		Mouse3		Mouse4
	Time (min)	Cell1	Cell2	Cell3	Cell4	Cell5	Cell6	Cell7	Cell8
	1	104.532	92.9165	96.7948	103.539	107.463	99.9985
	2	112.956	102.318	97.1609	103.128	100.201	105.852		98.7001
	3	93.3825	101.916	104.166	100.649	97.5318	87.2772		100.987
	4	102.033	87.7199	101.406	94.4787	97.9474	97.1786	103.862	99.9868
	5	87.0968	115.129	100.472	98.2049	96.8577	109.694	101.541	100.326
	6	85.9868	87.38	89.6187	97.8296	94.2776	105.526	94.597	99.1483
	7	92.7396	85.9984	84.4298	94.6055	88.0253	68.7498	93.6355	96.5254
	8	87.7207	91.0968	73.7517	89.9119	84.1241	98.7898	89.6421	91.692
	9	82.0523	64.4429	65.7212	86.8679	80.8201		84.0193	90.7477
	10	70.1409	83.3604	60.1156	85.5953	78.9718	62.5886	77.1439	88.2039
	11	68.0897	87.6316	47.6285	85.6221	78.0573	69.8428	72.7518	89.729
	12	55.3614	78.8906	45.5361	85.4625	78.846	31.5135	67.3452	85.1234
	13	51.849	77.8346	34.4188	88.8361	75.6504	30.996	66.958	81.7309
	14	57.8837	64.1391	33.9912	81.7158	74.2839	37.8894	61.407	83.7377
	15	55.1481	61.1354	29.3092	86.2262	72.9453	22.8228	58.4637	79.7702
	16	53.0462	84.1506	26.3119	80.909	71.7589	25.8607	55.2944	79.0663
	17	46.5474	75.3013	30.8942	74.0985	71.6355	32.6906	52.4045	78.6276
	18	40.1487	66.1418	27.8113	75.6232	72.7563	25.3428	50.8736	76.7416
	19	45.1512	68.0451	27.5931	72.921	69.8008	29.3041	50.4967	71.2696
	20	41.8014	68.0451	28.9047	72.921	66.6272	29.3041	46.9731	71.2696
	21	38.5289	70.0844	29.3444	70.9906	69.7513	26.2111	46.9731	69.2335
	22	42.5598	55.7952	32.9243	71.5983	68.2925	26.1015	45.8268	66.3666
	23	44.0546	68.4521	32.6161	69.329	66.8401	22.7603	46.8156	64.0763
	24	36.2377	67.6243	32.4652	75.065	64.4467	30.7323	45.4615	62.121
	25	35.0567	51.5926	31.7516	77.0359	63.5712	23.2341	44.8423	62.8525
	26	37.8724	63.3985	41.0112	71.8788	63.2851	28.2086	45.9719	58.1821
	27	35.7736	66.384	39.3698	71.2504	60.014	21.1071	44.349	53.5521
	28	36.005	60.5705	39.9214	73.22	61.0302	24.0792	41.0082	52.043
	29	31.548	68.5026	40.2448	74.033	59.0482	23.923	37.7353
	30	35.0301	51.5074	41.3179	72.3474	59.8336	21.6929	37.5271
	Panel J
		rostral IPN										lateral IPN
		Mouse1			Mouse2			Mouse3				Mouse1			Mouse2			Mouse3
	Stimulus #	Cell1	Cell2	Cell3	Cell4	Cell5	Cell6	Cell7	Cell8	Cell9		Cell1	Cell2	Cell3	Cell4	Cell5	Cell6	Cell7	Cell8	Cell9
	1	-6.76872	4.44857	-8.17086	-4.65482	3.39033	-3.59657	-2.33153	-4.96919	2.29419		-30.479	2.68592	-20.9863	-63.6795	-29.1964	-6.65978	-36.736	3.3125	-15.7807
	2	-10.6463	6.88956	-14.7998	-10.7388	5.72143	-5.93423	-0.45393	-12.6049	3.59861		-68.8971	0.022258	-43.1489	-115.674	-70.1034	-10.6554	-80.6472	0.780138	-35.3944
	3	-13.3126	3.72851	-24.4779	-8.27844	3.42506	-4.87286	-2.10232	-9.98967	2.15527		-115.129	-3.26648	-56.9292	-166.707	-118.283	-19.1012	-131.788	-1.72097	-69.5009
	4	-10.2748	0.880029	-31.8777	-4.97573	6.81539	-8.59098	-4.3505	-18.524	0.664025		-158.064	-6.7476	-82.5613	-212.667	-161.732	-30.3898	-180.483	-4.94097	-103.443
	5	-16.2621	-2.4974	-35.5026	-9.42001	2.41792	-2.30292	-2.83163	-4.23662	1.75589		-217.72	-12.609	-106.258	-257.424	-218.642	-49.7752	-223.185	-9.06739	-137.171
	6	-19.6317	-5.95899	-39.6414	-13.4858	7.0064	-5.7519	-0.05803	-11.4914	0.160454		-287.144	-18.6988	-132.422	-300.186	-282.449	-70.8425	-283.566	-12.5687	-179.322
	7	-17.3753	-9.61292	-44.197	-17.5099	3.82444	-3.05828	-2.43572	-8.29012	-2.01219		-361.788	-24.0913	-154.491	-339.414	-364.989	-93.3982	-349.397	-16.5076	-220.617
	8	-20.8621	-14.0603	-49.0235	-22.0196	0.442648	-6.80245	-5.03814	-13.6207	-0.39521		-458.295	-29.7844	-194.506	-379.676	-453.196	-118.112	-405.906	-20.2277	-263.936
	9	-26.4197	-17.5579	-55.9754	-26.3872	4.01545	-3.40556	-2.33153	-8.65152	-1.6649		-547.239	-36.92	-234.629	-422.534	-525.193	-137.706	-477.499	-23.8852	-307.551
	10	-31.86	-20.9353	-59.7912	-30.1295	8.08299	-7.02818	-4.60055	-14.0309	-3.36452		-644.496	-42.2764	-273.633	-463.926	-606.753	-157.582	-543.222	-28.6055	-351.841
	Panel K
		Mouse1		Mouse2	Mouse3	Mouse4	Mouse5
	Time (min)	Cell1	Cell2	Cell3	Cell4	Cell5	Cell6	Cell7
	1	93.3439	89.8198	99.9163		137.819	82.5823	87.4492
	2	103.915	97.327	107.553		107.412	72.0602	108.211
	3	88.9145	95.3687	104.619	105.43	96.6296	106.323	94.4717
	4	97.5132	107.26	104.528	95.5809	81.1233	106.015	102.2
	5	100.229	110.225	101.641	98.9895	77.0169	133.019	107.668
	6	87.4053	100.745	90.2713	95.6286	160.666	86.1236	91.3493
	7	106.884	107.166	91.0203	93.1678	117.792	59.4891	101.909
	8	107.969	111.74	87.2099	95.9252	73.64	90.4507	74.0924
	9	91.1261	90.8845	84.2962	83.8788	63.299	69.0531	75.4493
	10	82.1671	103.419	79.2649	88.651	58.9826	47.7393	65.6604
	11	63.8422	76.4069	71.0643	85.1297	93.9528	82.6195	76.2259
	12	42.6304	73.531	74.202	94.2503	81.7461	75.5009	62.9458
	13	66.0078	65.1941	70.1764	84.5422	85.6695	68.5718	52.0337
	14	42.6388	76.6172	69.9239	102.964	59.3113	61.6039	48.779
	15	51.0517	64.07	75.4714	96.2352	59.095	83.6274	49.8382
	16	51.6194	55.2918	65.6432	86.0527	99.5405	53.2553	41.8535
	17	26.2547	59.5638	66.0642	95.1442	45.3552	65.2619	29.2993
	18	37.7181	37.9612	62.7163	85.5296	65.9753	61.7236	37.3399
	19	34.7119	29.0339	71.0568	86.9309	58.7678	66.4082	35.5508
	20	34.7119	29.0339	59.3861	88.3897	91.3681	63.5246	37.4609
	21	31.1683	32.9908	62.2781	86.3264	63.8671	45.8338	28.0288
	22	44.4484	44.5308	61.6024	95.4143	79.3306	41.7255	39.5031
	23	31.1645	26.4925	57.404	90.4241	77.3073	54.265	27.5286
	24	33.6472	18.9161	55.371	79.9798	67.7949	62.2857	29.9405
	25	26.3226	27.5349	50.1315	88.2369	71.4382	53.1274	41.1929
	26	26.2669	25.0853	52.2245	87.6237	26.3358	36.7082	34.7142
	27	30.8633	17.9118	49.3882	81.417	0	42.1688	19.4286
	28	19.7678	22.2931	46.3549	87.1076	9.37785	30.5229	14.133
	29	27.4457	43.2515	41.7506	51.1266	0.0833	20.5442	6.98987
	30	13.7921	13.2385	34.057	18.8131	7.82944	12.7278	8.65768
	31	24.3967	17.8691	29.7867	8.44593	22.3668	7.60013	7.3725
	32	27.862	39.6636	28.7512	7.76999	0	9.32202	6.2003
	33			16.728	6.05078	0	7.24588	6.19972
	34			19.5483	6.81699	5.46093	3.72371	5.45803
	35			13.8944	5.06444	6.76282	4.15072	3.53032
	36			3.84666	5.45339		5.55976	6.21352
	37			4.20004	5.46317		3.93899	6.18094
	38			3.18077	7.73349
	39			3.76073	7.44235
	40			3.36055	6.58066
