# Supplementary material for: GABAB receptor auxiliary subunits modulate Cav2.3-mediated release from medial habenula terminals
Source: eLife. 2021 Apr 29;10:e68274. doi: 10.7554/eLife.68274 (PMC8121548; doi:10.7554/eLife.68274)
Supplement: Figure 2—figure supplement 1—source data 1. [file elife-68274-fig2-figsupp1-data1.xlsx]

## Sheet: Sheet1
	1	2876.18	No. 1	PM8		1	10561.3	No. 1	PM8			1	9412.97	No. 1	PM12b		1	35819.5	No. 1	PM12b		Exp. 1
	2	302.678	No. 1	full membrane 8		2	3853.35	No. 1	full membrane 8			2	32392.4	No. 1	cyto 12b		2	5088.25	No. 1	full membrane 12b
	3	47244.2	No. 1	cyto 8		3	77570.6	No. 1	cyto 8			3	1801.5	No. 2	PM12b		3	30888.1	No. 2	PM12b		Exp. 2
	4	1902.72	No. 2	PM8		4	13076.7	No. 2	PM8			4	29063.9	No. 2	cyto 12b		4	8924.14	No. 2	full membrane 12b
	5	57809.6	No. 2	cyto 8		5	1549.67	No. 2	full membrane 8			5	4343.47	No. 3	PM12b		5	23451.4	No. 3	PM12b		Exp. 3
	6	6400.97	No. 3	PM8		6	87751.3	No. 2	cyto 8			6	32648.2	No. 3	cyto 12b		6	7262.78	No. 3	full membrane 12b
	7	1498.36	No. 3	full membrane 8		7	15104.8	No. 3	PM8
	8	54928	No. 3	cyto 8		8	5484	No. 3	full membrane 8
						9	76178.7	No. 3	cyto 8
	1	2876.18	No. 1	PM8		1	10561.3	No. 1	PM8			1	9412.97	No. 1	PM12b		1	35819.5	No. 1	PM12b
	2	2876.18	No. 1	full membrane 8		2	10561.3	No. 1	full membrane 8			2	9412.97	No. 1	cyto 12b		2	35819.5	No. 1	full membrane 12b
	3	2876.18	No. 1	cyto 8		3	10561.3	No. 1	cyto 8			3	1801.5	No. 2	PM12b		3	30888.1	No. 2	PM12b
	4	1902.72	No. 2	PM8		4	13076.7	No. 2	PM8			4	1801.5	No. 2	cyto 12b		4	30888.1	No. 2	full membrane 12b
	5	1902.72	No. 2	cyto 8		5	13076.7	No. 2	full membrane 8			5	4343.47	No. 3	PM12b		5	23451.4	No. 3	PM12b
	6	6400.97	No. 3	PM8		6	13076.7	No. 2	cyto 8			6	4343.47	No. 3	cyto 12b		6	23451.4	No. 3	full membrane 12b
	7	6400.97	No. 3	full membrane 8		7	15104.8	No. 3	PM8
	8	6400.97	No. 3	cyto 8		8	15104.8	No. 3	full membrane 8
						9	15104.8	No. 3	cyto 8
	1	1	No. 1	PM8		1	1	No. 1	PM8			1	1	No. 1	PM12b		1	1	No. 1	PM12b
	2	0.105236	No. 1	full membrane 8		2	0.364854	No. 1	full membrane 8			2	3.44125	No. 1	cyto 12b		2	0.142052	No. 1	full membrane 12b
	3	16.4261	No. 1	cyto 8		3	7.34477	No. 1	cyto 8			3	1	No. 2	PM12b		3	1	No. 2	PM12b
	4	1	No. 2	PM8		4	1	No. 2	PM8			4	16.1332	No. 2	cyto 12b		4	0.288918	No. 2	full membrane 12b
	5	30.3826	No. 2	cyto 8		5	0.118506	No. 2	full membrane 8			5	1	No. 3	PM12b		5	1	No. 3	PM12b
	6	1	No. 3	PM8		6	6.7105	No. 2	cyto 8			6	7.51663	No. 3	cyto 12b		6	0.309695	No. 3	full membrane 12b
	7	0.234082	No. 3	full membrane 8		7	1	No. 3	PM8
	8	8.5812	No. 3	cyto 8		8	0.363064	No. 3	full membrane 8
						9	5.04334	No. 3	cyto 8
													Raw values					Normalized to (Signal/ ug of total protein)
														Exp. 1	Exp. 2	Exp. 3										ul	ug/ul	1	2	3
		1	No. 1	PM8		1	1	No. 1				KCTD8	PM	1	1	1		KCTD8	PM	1	1	1			PM, KCTD8	200	0.667217	14.9876	9.99175	20.0165		20.0165			20.0165	21.7992	21.6741
		0.105236	No. 1	full membrane 8		2	0.364854	No. 1				KCTD8	Cytosol	16.4261	30.3826	8.5812		KCTD8	Cytosol	10.9507	20.2551	5.7208			PM, KCTD8	205	0.708918	14.106	9.404	21.7992		21.7992			532.564	393.324	499.162
		16.4261	No. 1	cyto 8		3	7.34477	No. 1				KCTD8	Full membrane	0.364854	0.118506	0.363064		KCTD8	Full membrane	0.121618	0.039502	0.121021			PM, KCTD8	210	0.688067	14.5335	9.68897	21.6741		21.6741			48.1647	49.9162	47.6393
		1	No. 2	PM8		4	1	No. 2																	Cyto, 8	3870	1.37613	10.9001	7.26673	532.564		532.564
		30.3826	No. 2	cyto 8		5	0.118506	No. 2				KCTD12b	PM	1	1	1		KCTD12b	PM	1	1	1			Cyto, 8	3930	1.00083	14.9876	9.99175	393.324		393.324
		1	No. 3	PM8		6	6.7105	No. 2				KCTD12b	Cytosol	3.44125	16.1332	7.51663		KCTD12b	Cytosol	2.29417	10.7554	5.01109			Cyto, 8	3990	1.25103	11.9901	7.9934	499.162		499.162			13.3704	24.9581	14.3869
		0.234082	No. 3	full membrane 8		7	1	No. 3				KCTD12b	Full membrane	0.142052	0.288918	0.309695		KCTD12b	Full membrane	0.0473507	0.0963061	0.103232			Full membrane, 8	520	2.18931	13.703	9.13532	56.9219		56.9219			536.693	543.573	486.651
		8.5812	No. 3	cyto 8		8	0.363064	No. 3																	Full membrane, 8	780	2.18931	13.703	9.13532	85.3829		85.3829			55.061	62.4265	47.852
						9	5.04334	No. 3						Exp. 1	Exp. 2	Exp. 3									Full membrane, 8	628	2.12675	14.106	9.404	66.7801		66.7801
										Factor		KCTD8	PM	20.0165	21.7992	21.6741
										to acount for		KCTD8	Cytosol	532.564	393.324	499.162
										ul used in Input		KCTD8	Full membrane	56.9219	85.3829	66.7801									PM, KCTD12b	225	0.39616	25.2423	16.8282	13.3704		13.3704
																									PM, KCTD12b	210	0.39616	25.2423	16.8282	12.479		24.9581
												KCTD12b	PM	13.3704	24.9581	14.3869									PM, KCTD12b	230	0.417011	23.9802	15.9868	14.3869		14.3869
												KCTD12b	Cytosol	536.693	543.573	486.651									Cyto, 12b	3900	1.37613	10.9001	7.26673	536.693		536.693
												KCTD12b	Full membrane	69.2915	78.6899	60.0495									Cyto, 12b	3950	1.37613	10.9001	7.26673	543.573		543.573
																									Cyto, 12b	3890	1.25103	11.9901	7.9934	486.651		486.651
														Exp. 1	Exp. 2	Exp. 3									Full membrane, 12b	633	2.18931	13.703	9.13532	69.2915		69.2915
				62.3952	64.1467	61.4632				Normalized		KCTD8	PM	20.0165	21.7992	21.6741									Full membrane, 12b	629	2.50206	11.9901	7.9934	78.6899		78.6899
												KCTD8	Cytosol	8747.93	11950.2	4283.41									Full membrane, 12b	640	1.87655	15.9868	10.6579	60.0495		60.0495
												KCTD8	Full membrane	20.7682	10.1184	24.2454
												KCTD12b	PM	13.3704	24.9581	14.3869									1: ul of Input loaded on gel to achieve measured signal (as calculated in 320, PM = 10 ug, Cyto= 15 ug, full membrane = 30 ug)
												KCTD12b	Cytosol	1846.9	8769.56	3657.98									2 : ul of Input loaded adjusted to dilution by 1 x SB (divided by 1/3)
												KCTD12b	Full membrane	9.84302	22.735	18.5971									3: Factor of Input loaded to Total Input (Note that in Lane 2 only 5 ug of PM of KCTD12b could be loaded
														Exp. 1	Exp. 2	Exp. 3		Cyto + full membrane = 100%				1
										Normalized with		KCTD8	PM	20.0165	21.7992	21.6741		8768.7	11960.3	4307.65		8768.7	11960.3	4307.65
										loading error		KCTD8	Cytosol	8747.93	11950.2	4283.41						8768.7	11960.3	4307.65
				69.2915	78.6899	60.0495				for KCTD12b (see above)		KCTD8	Full membrane	20.7682	10.1184	24.2454						8768.7	11960.3	4307.65
																						1
												KCTD12b	PM	13.3704	12.479	14.3869		1856.74	4396.15	3676.58		1856.74	4396.15	3676.58
												KCTD12b	Cytosol	1846.9	4384.78	3657.98						1856.74	4396.15	3676.58
												KCTD12b	Full membrane	9.84302	11.3675	18.5971						1856.74	4396.15	3676.58
										Adusted to 100%		KCTD8	PM	0.228272	0.182263	0.503154	0.304563											56.9219	58.6734	56.1463
												KCTD8	Cytosol	99.7632	99.9154	99.4372	99.7052		100	100	100
												KCTD8	Full membrane	0.236845	0.0845994	0.562846	0.294763
												KCTD12b	PM	0.720101	0.283863	0.391312	0.465092
												KCTD12b	Cytosol	99.4699	99.7414	99.4942	99.5685		100	100	100
												KCTD12b	Full membrane	0.530124	0.258578	0.505825	0.431509
													8, PM	8, Cyto	8, AM	12b, PM	12b, Cyto	12b, AM
													0.228272	99.7632	0.236845	0.720101	99.4699	0.530124
													0.182263	99.9154	0.0845994	0.283863	99.7414	0.258578
													0.503154	99.4372	0.562846	0.391312	99.4942	0.505825

## Sheet: Sheet2
			1	Raw values (PM = Plasma membrane, TM = total membrane)
			Exp. 1		Exp. 1		Exp. 2		Exp. 2		Exp. 3		Exp. 3
			Plasma		Total		Plasma		Total		Plasma		Total
			membrane		membrane		membrane		membrane		membrane		membrane
			10561.3		3853.35		13076.7		1549.67		15104.8		5484		KCTD8-Flag
			35819.5		5088.25		30888.1		8924.14		23451.4		7262.78		KCTD12b-Flag
			2	ug of total membrane protein used for Western Blotting (protein concentration determined by Bradford analysis of the points)
			Exp. 1		Exp. 1		Exp. 2		Exp. 2		Exp. 3		Exp. 3
			Plasma		Total		Plasma		Total		Plasma		Total
			membrane		membrane		membrane		membrane		membrane		membrane
			10		30		10		30		10		30		KCTD8-Flag
			10		30		10		30		10		30		KCTD12b-Flag
			3	Normalized values 1: Raw values divided per ug total protein
			Exp. 1		Exp. 1		Exp. 2		Exp. 2		Exp. 3		Exp. 3
			Plasma		Total		Plasma		Total		Plasma		Total
			membrane		membrane		membrane		membrane		membrane		membrane
			1056.13		128.445		1307.67		51.6556		1510.48		182.8		KCTD8-Flag
			3581.95		169.608		3088.81		297.471		2345.14		242.093		KCTD12b-Flag
			4	Average of all "Total membrane" points (Exp. 1 - 3):
			120.967		KCTD8-Flag
			236.391		KCTD12b-Flag
			4	Fold-increase of KCTD signal at the plasma membrane (PM) compared to the averaged KCTD signal in total membrane (TM)
			Exp. 1		Exp. 1		Exp. 2		Exp. 2		Exp. 3		Exp. 3
			Plasma		Total		Plasma		Total		Plasma		Total
			membrane		membrane		membrane		membrane		membrane		membrane
			8.73077		1.06182		10.8102		0.427023		12.4867		1.51116		KCTD8-Flag
			15.1527		0.717491		13.0665		1.25839		9.9206		1.02412		KCTD12b-Flag
