# Supplementary material for: GABAB receptor auxiliary subunits modulate Cav2.3-mediated release from medial habenula terminals
Source: eLife. 2021 Apr 29;10:e68274. doi: 10.7554/eLife.68274 (PMC8121548; doi:10.7554/eLife.68274)
Supplement: Figure 2—source data 1. [file elife-68274-fig2-data1.xlsx]

## Sheet: Sheet1
		Panel F
		Control	KCTD8	KCTD12b
		19.49	60.41	17.31
		54.14	80.93	85.25
		53	69.84	13.36
		18.21	91.94	47.34
		31.2	60.91	21.3
		21.92	93.02	19.01
		15.1	54.48	49.85
		39.44	28.23	68.01
		11.79	14.01	77.85
		24.61	57.62	13.44
		26.89	73.9	21.02
		77.83	56.89	36.21
		32.5	66.83
		38.14
		64.68
		Panel G
		Voltage (mV)	Control (n = 14)														KCTD8 (n = 10)										KCTD12b (n = 8)
		-70	-0.22	-2.56	1.29	-0.64	0.07	-0.53	0.13	0.14	-0.08	-0.27	-0.78	0.43	-0.22	0.63	0.23	0.04	0.04	0.13	0.41	-0.44	-0.41	0.49	0.48	-0.24	1.71	0.39	0.18	-0.19	-0.08	0.23	-0.29	-0.12
		-60	0.17	-0.86	1.43	0.25	-0.05	-0.1	0.43	0.16	0.02	-0.13	-0.03	0.81	0.03	0.38	0.38	-0.62	-0.27	-0.38	0.28	-1.13	-0.25	0.19	0.21	0.4	-0.04	-0.17	0.07	-0.04	-0.23	-0.07	-0.37	0.05
		-50	-0.12	-0.22	1.69	0.56	0.08	0.46	-0.67	0.23	0.38	-0.15	-0.43	-0.67	-0.5	0.27	-0.02	0.02	0.25	-0.04	-0.05	-1.46	0.28	0.16	-0.19	0.66	0.35	-0.03	-0.41	-0.05	-0.3	-0.38	-0.28	-0.13
		-40	-0.45	0.37	-0.87	0.48	-0.55	-0.18	-0.13	-0.01	-0.04	-0.16	-1.3	-0.7	-0.52	0.34	-0.35	0.19	-0.09	0.04	-0.84	-0.88	-0.09	-0.31	-0.24	-0.61	-0.75	-0.84	-0.62	-0.18	-0.07	-0.85	0.03	-0.51
		-30	-1.05	-2.21	-2.03	0.46	-1.88	-0.85	-0.49	-1.1	-0.6	-1.09	-4.79	-3.38	-2.26	-2.09	-3.28	-0.56	-1.17	-1.08	-4.24	-3.46	-1.14	-2.51	-2.81	-2.05	0.15	-1.72	-1.48	-0.62	-1.02	-2.13	-2.57	-0.03
		-20	-2.9	-4.6	-10.76	-3.52	-6.17	-4.01	-2.9	-4.83	-2.09	-4.55	-15.43	-5.36	-6.78	-8.97	-14.05	-2.01	-4.98	-5.64	-16.54	-12.18	-2.76	-9.72	-17.72	-7.75	-8.1	-2.09	-6.92	-3.06	-3.63	-8.62	-9.34	-4.28
		-10	-8.1	-18	-32.42	-9.02	-14.36	-10.28	-7.03	-14.96	-4.71	-11.98	-35.58	-20.35	-16.97	-28.4	-38.31	-8.1	-19.79	-22.18	-47.43	-26.32	-6.36	-24.74	-63.74	-20.68	-29.38	-5.1	-20.89	-7.62	-8.83	-21.29	-27.59	-13.12
		0	-16.06	-38.05	-42.56	-15.1	-21.69	-15.45	-10.8	-27.6	-8.69	-21.63	-55.39	-22.75	-29.16	-50.51	-66.89	-36.45	-51.85	-45.63	-77.52	-39.19	-10.62	-42.29	-72.03	-41.72	-75.44	-10.34	-34.78	-12.83	-14.26	-36.97	-49	-23.61
		10	-18.95	-53.84	-44.32	-18.42	-23.56	-16.77	-12.15	-33.27	-10.86	-28.43	-65.05	-30.15	-36.12	-65.08	-82.69	-60.63	-72.4	-54.62	-81.28	-45.44	-12.55	-51.2	-62.1	-54.69	-99.3	-11.63	-38.65	-16.34	-17.47	-46.07	-55.73	-30.12
		20	-17.94	-59.16	-42.56	-16.4	-20.82	-16.23	-11.05	-32.2	-10.98	-29.21	-61.6	-26.48	-34.15	-55.96	-74.12	-55.01	-74.7	-50.91	-65.68	-39.06	-12.39	-49	-49.87	-64.29	-84.47	-10	-34.04	-17.77	-16.66	-46.71	-49.72	-32.75
		30	-14.25	-50.95	-32.57	-12.38	-16.16	-12.39	-8.85	-26.76	-9.6	-24.45	-47.71	-19.41	-27.98	-49.59	-57.83	-44.33	-63.44	-40.97	-46.01	-27.76	-9.84	-39.07	-37.26	-53.39	-57.38	-7.99	-25.99	-14.68	-15.34	-37.07	-38.37	-25.09
		40	-8.78	-37.3	-19.46	-7.72	-10.36	-7.91	-5.51	-18.64	-6.68	-16.74	-31.44	-13.45	-19.37	-30.34	-38.86	-37.8	-47.36	-29.13	-29.05	-18.18	-6.64	-26.52	-26.11	-40.15	-30.95	-5.39	-17.1	-10.81	-10.38	-24.74	-25.61	-16.32
		50	-3.59	-21.69	-9.59	-5.08	-5.93	-3.43	-2.95	-11.08	-4.89	-10.36	-20.02	-5.74	-10.49	-16.85	-22.3	-25.76	-29.58	-18.03	-15.94	-7.72	-3.82	-14.4	-15.72	-27.02	-7.73	-2.93	-9.54	-7.18	-7.18	-13.34	-14.2	-8.32
		60	0.92	-9.18	-2.44	-1.32	-2.47	-1.49	-1.11	-4.66	-1.75	-4.73	-8.99	0.05	-4.73	-2.69	-9.99	-14.29	-14.53	-9.25	-7.76	-2.08	-1.76	-5.85	-7.66	-14.91	13.78	-0.5	-4.17	-3.61	-2.87	-5.59	-6.61	-3.18
		Panel H Activation Curve
		Voltage (mV)	Control (n = 6)						KCTD8 (n = 7)							KCTD12b (n = 4)
		-80	0.001965	-0.001792	-0.006451	-0.01242	-0.009165	-0.006799	-0.00164	0.004706	0.002674	-0.000325	0.01531	-0.002438	0.002948	0.002652	0.003151	-0.003017	-0.001965
		-70	-0.005223	0.000716	-0.003569	0.000511	-0.006353	-0.014777	0.002917	-0.004389	-0.004168	-0.021916	-0.002968	0.002295	0.001334	0.002642	0.00207	-0.009905	-0.001961
		-60	-0.009908	0.00442	-0.002757	-0.005901	0.000939	0.002816	-0.001825	0.002118	0.003064	0.008854	0.018525	-0.005579	-0.003458	-0.005479	-0.00031	0.007466	0.003077
		-50	-0.005731	0.002826	-0.004038	0.016734	0.004124	-0.001757	0.00317	0.002116	-0.004986	-0.015138	-0.002135	0.004151	-0.003701	0.000847	0.003849	0.004789	0.004704
		-40	0.002803	-0.008067	6.4e-05	0.018441	0.000522	0.004353	-0.00085	-0.001979	0.000809	0.020997	0.004877	0.003368	-0.003589	0.019289	-0.005774	-0.006256	0.005001
		-30	0.003678	0.007065	0.017221	0.026794	0.015314	0.012373	0.003924	0.001485	0.018374	0.034195	-0.001428	0.013021	0.008243	0.021383	0.012699	0.017636	0.007973
		-20	0.045779	0.041464	0.062163	0.051284	0.069482	0.065422	0.016001	0.019432	0.07073	0.127295	0.020202	0.037485	0.030079	0.069888	0.017743	0.060631	0.050778
		-10	0.127513	0.131162	0.164246	0.1583	0.172329	0.175324	0.086238	0.104459	0.190097	0.279731	0.130299	0.115349	0.08516	0.248657	0.060457	0.160159	0.156906
		0	0.274324	0.29091	0.352029	0.330442	0.322685	0.345475	0.259449	0.25764	0.341953	0.466093	0.302314	0.275083	0.20084	0.519786	0.217727	0.352125	0.312231
		10	0.442038	0.475284	0.541823	0.524661	0.48699	0.516252	0.485354	0.433627	0.515404	0.600503	0.480674	0.48013	0.38921	0.668739	0.369437	0.54002	0.494751
		20	0.617152	0.644572	0.674079	0.692827	0.647396	0.649692	0.668613	0.617001	0.623935	0.743441	0.655023	0.649339	0.553378	0.786159	0.497727	0.698427	0.65651
		30	0.742577	0.780022	0.803812	0.826137	0.784692	0.757225	0.817002	0.75787	0.757545	0.862991	0.731772	0.779589	0.703021	0.8509	0.756262	0.814433	0.781564
		40	0.843401	0.857969	0.897423	0.91748	0.867876	0.854325	0.926328	0.868945	0.847099	0.923752	0.917412	0.87197	0.81145	0.923897	1.07601	0.893475	0.880693
		50	0.927754	0.950509	0.965787	0.971398	0.920386	0.926507	0.975215	0.936252	0.933694	1.01512	0.955561	0.949093	0.93604	0.961883	1.01277	0.935763	0.933356
		60	1	1	1	1	1	1	1	1	1	1	1	1	1	1	1	1	1
		Panel H Inactivation Curve
		Voltage (mV)	Control (n = 7)								KCTD8 (n = 8)								KCTD12b (n = 6)
		-120	1	1	1	1	1	1	1	1	1	1	1	1	1	1	1	1	1	1	1	1	1
		-110	0.954679	0.982413	0.986568	1.01182	1.05378	0.991059	0.93894	0.940404	0.925872	1.01093	0.971377	0.928334	0.928948	0.973794	1.0045	0.99767	0.98007	1.10113	0.931891	0.939507	0.978157
		-100	0.87122	0.992645	0.972398	1.00723	1.03241	0.94994	0.835001	0.880543	0.87682	0.974928	0.96988	0.852059	0.794025	0.943632	0.940934	0.928883	0.956722	1.01826	0.945343	0.880316	0.940973
		-90	0.892976	0.958438	0.90486	0.946943	0.987577	0.90085	0.777582	0.707658	0.800482	0.956127	0.939345	0.777381	0.669878	0.882686	0.931567	0.920214	0.920643	0.990071	0.921427	0.788072	0.904823
		-80	0.823262	0.912162	0.866256	0.921675	0.878848	0.857214	0.661733	0.569492	0.716485	0.933048	0.896444	0.694134	0.534934	0.814815	0.916495	0.855682	0.874935	0.879281	0.891343	0.679939	0.856072
		-70	0.710471	0.762706	0.743679	0.821426	0.649068	0.729232	0.512453	0.400761	0.671214	0.850376	0.826744	0.492059	0.396811	0.677998	0.786382	0.808697	0.764725	0.752169	0.714762	0.576561	0.727234
		-60	0.56761	0.556047	0.552505	0.657005	0.591825	0.528034	0.331315	0.226842	0.613464	0.674647	0.669886	0.270993	0.251745	0.466466	0.552664	0.590971	0.55732	0.57343	0.493654	0.375677	0.520289
		-50	0.365211	0.373666	0.347992	0.449234	0.463278	0.361951	0.163145	0.162662	0.543511	0.448339	0.439516	0.120337	0.171129	0.270772	0.327612	0.299304	0.335217	0.365721	0.233005	0.205777	0.311026
		-40	0.16343	0.274799	0.20038	0.249157	0.34994	0.251564	0.097528	0.113644	0.417975	0.24619	0.231127	0.075275	0.090861	0.140387	0.180648	0.081079	0.193842	0.24034	0.142743	0.119199	0.178743
		-30	0.100493	0.158646	0.058816	0.166448	0.23854	0.145984	0.060488	0.024851	0.275387	0.121724	0.122356	0.046933	0.033338	0.074311	0.109985	-0.013372	0.102846	0.17007	0.063635	0.044952	0.102491
		-20	-0.003696	0.067005	-0.002739	0.094371	0.18764	0.073736	0.030446	-0.03725	0.193338	0.055255	0.087463	0.012848	-0.04424	0.031071	0.070982	-0.073663	0.049844	0.201514	0.0564	-0.007063	0.041791
		-10	-0.01619	0.0118	0.04937	-0.032193	0.019576	-0.002816	-0.000689	-0.039157	0.085727	0.017057	0.014408	0.009544	-0.05302	-0.003059	0.014959	-0.07479	-0.003634	0.05987	-0.019251	-0.030816	-0.017156
		0	0.007875	0.00528	-0.023736	-0.059516	-0.01824	-0.048927	-0.004143	-0.00491	0.050068	-0.017842	0.000488	-0.00327	-0.004007	-0.004118	0.004941	-0.044158	-0.026759	-0.034443	-0.031094	-0.023963	-0.032673
		10	0.023685	-0.010283	0.103752	-0.00153	-0.041275	-0.001698	-0.001302	-0.015961	0.000275	-0.005263	-0.000223	-0.008366	-0.007012	0.003374	-0.002414	-0.008904	-0.006002	-0.031744	0.011743	-0.00531	0.005081
