# Supplementary material for: GABAB receptor auxiliary subunits modulate Cav2.3-mediated release from medial habenula terminals
Source: eLife. 2021 Apr 29;10:e68274. doi: 10.7554/eLife.68274 (PMC8121548; doi:10.7554/eLife.68274)
Supplement: Figure 3—figure supplement 1—source data 1. [file elife-68274-fig3-figsupp1-data1.xlsx]

## Sheet: Sheet1
	Cav2.3							KCTD8							KCTD12			KCTD12b
	M1 rostral	M2 rostral		M1 lateral	M2 lateral			M1 rostral	M2 rostral		M1 lateral	M2 lateral			M1 rostral	M2 rostral		M1 rostral	M2 rostral			particle distances in µm
		0.19383		0.139216					0.155575			0.0291223				0.0775802		0.111338	0.167561
	0.136747	0.139804		0.116445				0.0769526	0.134593		0.131846	0.0273428			0.176494	0.0318207		0.100849	0.152704
	0.101748	0.016031		0.0433599	0.0977889			0.164315	0.117145		0.116187	0.0246548			0.146955	0.0218374		0.0105342	0.13105
	0.0838849			0.0313992	0.107108			0.0757222	0.104551		0.02188	0.0131053			0.0182536
	0.0962074			0.0164883				0.140683	0.0588633		0.11203	0.160959			0.025965	0.0203407			0.100672
	0.0672852	0.074131			0.0397392			0.107708	0.0469276		0.0761189	0.021646			0.0238553	0.0487422		0.183544	0.060319
	0.0889622	0.106838		0.0421522	0.0179637			0.092813	0.023687		0.0374002	0.0115236			0.0164829	0.0225319		0.162448	0.090967
		0.120529		0.0665249	0.0535951				0.107112		0.01465	0.00601446				0.0115776		0.143437	0.057787
		0.02075		0.0193779					0.0725621			0.14336			0.158241	0.0091		0.126665
				0.051176				0.142495	0.0796453		0.0577472	0.0662933			0.169849	0.0690211		0.108119	0.059724
		0.050036		0.0125756	0.0228144			0.139513	0.0811086		0.0204251	0.143299			0.142804	0.0762517		0.0214437	0.071994
	0.105332	0.060415		0.0807243	0.0353407			0.0949128			0.0666116	0.137986			0.159581	0.0620519		0.0597717	0.053087
		0.048009			0.126836			0.0743961	0.190985		0.0136076	0.0551674			0.0346948	0.0390842			0.034411
	0.184178	0.037098							0.169595			0.0388094			0.0226346	0.0183227			0.026918
	0.115786								0.0654585			0.0539901			0.0127298	0.0871381		0.146359	0.026024
	0.0643746	0.070038		0.0691568					0.0886779		0.17782	0.111883			0.0123874	0.0267139		0.165705	0.017635
	0.0382701	0.015951		0.0333731					0.0777247		0.0903507	0.0934075			0.0048618	0.0432194		0.0994869	0.098922
		0.020933		0.0157643	0.0427977			0.034116	0.0557962		0.0481378	0.0338769			0.165256	0.0333088		0.0963116	0.046867
		0.095079		0.0356337	0.0203703				0.0286714		0.149821	0.0154777				0.0198319		0.0619788	0.043235
		0.18523		0.0981494					0.0445908		0.0660858					0.01077		0.0543159
		0.021013		0.0757705					0.0671551		0.0878849	0.0206658			0.0330555	0.0484227		0.0309535	0.132579
	0.0649024	0.075299		0.0125982	0.0161093				0.0411726		0.0738813	0.154659			0.04056	0.0140761		0.0194657	0.034802
	0.0940113	0.053016			0.0362913				0.0221084		0.052661	0.130157			0.0304491	0.0174877		0.0183729	0.009328
	0.0718062	0.044217			0.0227524				0.0786871		0.192528	0.0529936			0.0183178	0.012838		0.0921022
	0.0480422	0.021919			0.0282518				0.0682853		0.171114	0.128583			0.0102694	0.0251139		0.0800818	0.156286
	0.0273395	0.025744							0.0896411		0.0963043	0.120391			0.092292	0.183633		0.0740665	0.12096
	0.092297	0.01775			0.0831799			0.170512	0.0725252		0.0598567	0.110525			0.0926308	0.174087		0.0473649	0.128041
				0.161012	0.0514971			0.169154			0.031654	0.0522674			0.070432	0.140014		0.0345839
				0.154011	0.179851			0.134706	0.176732		0.184783	0.0993218			0.176879	0.11584		0.015626	0.040737
		0.125609		0.0365614	0.159557			0.107034	0.159191		0.157545	0.0194654			0.198768	0.113963		0.009178	0.185467
		0.011403		0.0221071	0.150088			0.0661221	0.147212		0.0900903	0.012364			0.187051	0.0395983			0.167579
		0.020241			0.196072			0.0199816	0.0456174		0.0126267				0.0810811	0.00972623			0.117399
					0.0844192			0.0936538	0.0634582		0.145488	0.121682			0.0315464	0.022718		0.0637352	0.104707
				0.0869874	0.130177				0.0749838		0.103628	0.115628			0.0196015	0.0198065		0.02292	0.081436
	0.0373124								0.0595271		0.0448206	0.100852			0.0282918	0.125541			0.057441
									0.0267513		0.0340135	0.0291305			0.00978636	0.138211		0.134352	0.139377
				0.0227089				0.148094	0.0145006		0.0476749	0.0151923			0.0338353	0.123877		0.12907	0.120926
	0.0614731				0.0740139			0.116724	0.0947816						0.00768234	0.110461		0.110273	0.112839
	0.0354316				0.0173242			0.0226905	0.094964		0.127672	0.166798			0.022726	0.0882448		0.0793896	0.104686
	0.0419596							0.136368	0.0739942		0.111335	0.145847			0.0148848	0.103729		0.0545471	0.129899
	0.0189663			0.0261138				0.0909498	0.0558871		0.178321	0.133274			0.034226			0.0226997	0.16379
	0.015721							0.034757	0.118028		0.123238	0.0972794			0.024657			0.146844	0.135368
	0.09311			0.0345801				0.0199634	0.10771		0.0985171	0.0914026						0.130424	0.126255
				0.00899112				0.0115918	0.0942528		0.0558901	0.056911						0.0193478
				0.0136073					0.0451462		0.0494843
	0.0228393							0.0276429	0.0264814		0.0292375	0.0829975			0.0130425				0.108062
	0.0246049			0.182735				0.0293659	0.0895415		0.0450065	0.067926			0.0218976			0.160925	0.074114
				0.0864388					0.0811768		0.182153	0.0509786						0.170392	0.011777
	0.113586			0.0819124					0.0683777		0.193454	0.0380249			0.161916			0.193277	0.042821
	0.0621402			0.015581				0.118505	0.17057		0.181737	0.0145047			0.184091			0.139075	0.118205
	0.089773							0.110706	0.125816			0.0475502			0.0182097			0.12453	0.117037
				0.0665481				0.0348043	0.0738543		0.173955	0.0361056			0.0169184			0.168827	0.037679
				0.151873				0.0161728	0.104506		0.152678	0.0182126			0.00714643			0.137089	0.115923
				0.123938					0.0890124		0.0153494	0.165347			0.119368			0.110849
	0.135769			0.0824456					0.0497442		0.0580774	0.180557			0.0739188			0.0945119	0.164544
				0.0437068					0.0415104		0.181132	0.0249645			0.0643629			0.0801706	0.165556
				0.0425918				0.17924	0.0304614		0.156244	0.0137889			0.0516288				0.136371
	0.0273057			0.0253824				0.128427	0.0107325		0.0354814				0.0178058			0.0660529	0.064895
	0.00601465							0.120456	0.18041		0.0341223	0.18103			0.0253423			0.0541994	0.150213
								0.0856548	0.161032		0.0120773	0.173655			0.00989602			0.0462936	0.116195
	0.108626							0.0324552	0.128602		0.184559	0.161764			0.0274852			0.0298523	0.015376
	0.0534401			0.083976				0.0498908	0.0881168		0.162157	0.0192999			0.0249799			0.0235887	0.010038
				0.0463791				0.0366986	0.0803382		0.139753	0.0376989			0.0214677			0.144353	0.052745
								0.0632744			0.0230934	0.0252251			0.00696271			0.0930957	0.036052
	0.156741			0.109059				0.0416309	0.163015		0.0167224	0.0144905			0.0598204			0.0745808	0.030815
	0.138953			0.0845677					0.13252		0.1668	0.088052			0.0411598			0.0446301	0.008792
				0.0757146				0.0701423	0.0311041		0.177172	0.0474522			0.0341807			0.0223321	0.007692
	0.146149			0.0983878				0.0127127	0.0148266		0.134696	0.140592			0.021884			0.0117589	0.040408
	0.115673			0.0958608				0.0451776	0.0520003		0.163107	0.136932						0.18988	0.127673
				0.0766378				0.0600326	0.043191		0.0786509	0.0905628			0.0381435			0.182341	0.119848
	0.00684942			0.0660176				0.0333127	0.0293496		0.142753	0.152295			0.0135304			0.17897	0.108925
	0.198032			0.0333075				0.111634	0.0157814		0.0721077	0.0350723			0.0267898			0.0187512	0.103818
	0.0871768			0.0862277				0.102097	0.137704		0.02978	0.0177088			0.010831				0.099074
	0.108741							0.0457113			0.0128364							0.187993	0.08583
	0.0351644							0.159862	0.152693		0.0267917							0.147448	0.063249
	0.0161603			0.0631829				0.0727945	0.137602		0.190057	0.190135						0.1771	0.054378
				0.0360053				0.0864798	0.119886		0.17097	0.162275						0.157698	0.039781
	0.02985			0.0246637				0.0990561	0.0839112		0.154089	0.168985						0.0311526	0.023761
	0.0137145			0.0804857				0.0105459	0.0585223		0.0900479	0.144347						0.0152133	0.019829
	0.0286746							0.0243486	0.0481669		0.0866317	0.134088						0.110455	0.12757
								0.168063	0.0330165		0.0262991	0.0753828						0.0903616	0.120796
	0.0360921							0.119488	0.0135094		0.0242637	0.138455						0.0774293	0.093281
	0.0392439							0.0813796	0.014		0.0291122	0.118752						0.0475666	0.012959
	0.0141991			0.119521				0.138114	0.0553654		0.00688281	0.101183						0.027006	0.023689
								0.0886898	0.0325721		0.0230378	0.0839613						0.0676733	0.010847
								0.0835659	0.0186684		0.0103533	0.0677282						0.0451029	0.012474
								0.0142398			0.151581	0.0539145						0.0297333	0.016279
	0.0262468							0.153965	0.189418		0.0563555	0.0270322							0.05571
								0.1244	0.12466		0.0222568	0.0150875						0.0804463	0.058171
	0.0524977							0.0368174	0.0429312		0.0306096	0.0363346						0.0945038	0.096135
	0.041051							0.0343722	0.0143454		0.116595	0.0203381						0.0598004	0.007904
	0.0326551							0.150739	0.0879999		0.0877422	0.0962314						0.0125126	0.041901
								0.0111744			0.186797	0.0857355						0.0125063	0.151535
	0.0244323										0.134512	0.109173						0.126221	0.068644
	0.0293759							0.127564			0.176788	0.100735						0.117044	0.05382
								0.10497	0.121644		0.162563	0.0203681						0.0808367	0.146807
								0.0331895	0.132885		0.0950281	0.140447						0.0911635	0.13401
								0.026817	0.11563		0.0635092	0.039287						0.0775873	0.120569
								0.0135503	0.100781		0.0419563							0.0389885	0.084644
								0.150629	0.0721355		0.0428151	0.177567						0.0493099	0.070137
								0.104961	0.185249		0.0350749	0.0770178						0.0835228	0.031111
									0.161385		0.0324518	0.128863						0.0213171	0.01546
									0.139967		0.0272766							0.0657053	0.00963
									0.11159		0.0132312							0.0456934	0.17081
								0.159242	0.0684874		0.140298							0.0445107	0.190785
								0.054695	0.0478424		0.0274081							0.01774	0.170458
									0.0436179		0.0470812							0.0903174	0.153509
									0.179181		0.0264179							0.0907302	0.157426
									0.158699		0.0631015							0.0741408	0.126737
								0.0962825	0.134725		0.0414334							0.0115032	0.043137
									0.0534523		0.157036							0.0536651	0.023804
									0.0295344									0.145698	0.017604
								0.0238124	0.0108569		0.127521							0.0915413	0.019366
								0.0977865	0.0144697		0.105892							0.0670739	0.118949
								0.0800232	0.0994435		0.03188							0.0730593	0.027561
								0.074946	0.0737199		0.0147428							0.0440397	0.172718
								0.0747639	0.0193241		0.0498567							0.0123427	0.173308
								0.0177485	0.0230892		0.0370105								0.168454
								0.0130025	0.0201371		0.0197583								0.11909
								0.0153942	0.00895545									0.150979	0.119048
									0.028222		0.116806								0.070982
								0.0902574	0.0103305		0.196438							0.162249	0.063374
								0.0598055	0.150396		0.1638							0.154224	0.054376
								0.187253	0.135988		0.140193							0.12983
									0.120335		0.134207							0.128118	0.162295
								0.0297645	0.0854883		0.0752065							0.108599	0.104551
								0.169821	0.0699897		0.106002							0.0842246	0.075148
								0.149297	0.059504		0.0786939							0.111484	0.01344
								0.132956	0.134757		0.061726								0.009086
								0.0220246	0.13248		0.0466884							0.0735458	0.036455
								0.100141	0.104666		0.0971364							0.0391045	0.018222
								0.0257111	0.119271		0.0777369							0.0131817	0.026027
								0.0358083	0.101195		0.0258945								0.110105
								0.0238649	0.101509		0.0178632								0.14554
								0.0123105	0.0860741		0.156719							0.18618	0.127984
								0.0187789	0.0683237		0.186061							0.158137	0.122638
								0.114744										0.138845	0.106664
								0.0636115	0.188678		0.189986
								0.0225063	0.0784803		0.158212							0.1991	0.189027
									0.129995		0.129035							0.181123	0.182727
									0.135254		0.143479							0.163233	0.073485
								0.0574843			0.126889							0.159844	0.055964
								0.0801767	0.154574		0.125104							0.145648	0.043921
								0.0534607	0.0333414		0.0332206							0.123218	0.023887
								0.0276244	0.0200691		0.0337053							0.125127	0.008673
									0.121824		0.0690763							0.0904152	0.008881
									0.0942248		0.0814143							0.0694265	0.064481
									0.0586004		0.0382126							0.106684	0.041102
									0.0319423		0.0780981							0.0900933	0.016696
									0.0143005		0.0531178							0.160393	0.017483
									0.0266556		0.03846							0.115111	0.004997
									0.0604511		0.160412							0.0805317
											0.188869							0.0464109
									0.1433		0.15699							0.0100119	0.016503
									0.132448		0.150005							0.0388216	0.035437
									0.0238639		0.0135482							0.0327925	0.196934
									0.0117383									0.0786939	0.158336
									0.020508		0.134062							0.0944054	0.133894
									0.124663		0.0131							0.0256023	0.124824
									0.0405666		0.00960878							0.0134127	0.107552
									0.0123684									0.121259	0.137253
																		0.127797	0.117417
											0.199226							0.102349	0.131544
									0.181176		0.162298							0.0880209	0.131592
									0.100364		0.123319							0.0820932	0.10579
									0.0505156		0.0638503							0.0695817	0.061899
									0.0395795		0.074905							0.0517807	0.078433
									0.0595399		0.0664952							0.0226953	0.013493
									0.0812543		0.158016							0.0122188	0.176186
									0.0609129		0.173445							0.0114133	0.086081
									0.105473		0.144503								0.13789
									0.0490629		0.0845594							0.0366238	0.0599
									0.0228484		0.123675							0.0858959	0.073335
									0.101743		0.175196							0.0523977	0.109501
									0.081616		0.0289479							0.0264168	0.056264
									0.0348514		0.0153081							0.0656826	0.059025
									0.0383942									0.041315	0.034653
									0.0561448		0.0767748							0.016605	0.015537
									0.0272589									0.0972868	0.027915
									0.00867937		0.181607							0.0886415	0.012886
									0.0415383		0.0367944							0.0273079	0.012889
									0.0122017		0.0218331							0.0266252	0.011277
											0.00994797							0.00775744	0.128631
									0.0685937		0.166405							0.00784034	0.114671
									0.0444588		0.060962								0.012669
									0.0344365		0.0330508							0.0724779	0.008595
									0.0199452		0.0377223							0.0569722	0.010657
									0.0262579		0.0121594							0.0676985	0.01658
											0.115652							0.151094	0.006806
									0.196109		0.150607							0.0165937	0.013814
									0.146796		0.0999637							0.028832	0.059605
									0.0809952		0.126071							0.0575842	0.046808
									0.0780987		0.106734							0.0385278	0.026658
									0.0166134		0.0720712							0.0218614	0.015334
									0.0270376		0.0854758							0.00555	0.058633
											0.0757899							0.0466165	0.056659
											0.129239							0.0647592	0.061006
											0.0417222							0.041977	0.041956
											0.0254645							0.0105675	0.089754
											0.0111603							0.0199423	0.069708
									0.0191786		0.164022							0.0126976	0.058139
									0.197429		0.177129								0.035211
									0.173813		0.017715							0.165917	0.027001
									0.136564		0.17797							0.114548	0.076657
									0.121059		0.0350924							0.105596	0.015947
									0.0583103									0.0925172	0.014844
									0.100713		0.0280807							0.116238	0.141212
									0.0919397		0.057435							0.114015	0.115914
									0.0692355		0.0575177							0.0973028	0.090542
									0.0585868		0.0378146								0.077803
									0.0361429		0.0405432								0.042951
									0.0222185		0.024381								0.165476
									0.0208706		0.00933006								0.067913
									0.0143327		0.108835								0.044657
									0.158336		0.151975								0.036532
									0.138463		0.104111								0.025026
									0.101985		0.0846775
									0.0702444		0.0854678								0.149785
									0.044581		0.06732								0.137943
									0.0224455		0.0758785								0.126612
									0.0145255		0.067479								0.058998
									0.0313036		0.0524745								0.019177
									0.0296183		0.0264447								0.011392
									0.0203762										0.03334
									0.0712488		0.0771009								0.041719
									0.0505141		0.146518								0.011503
									0.0553742		0.169792								0.151474
									0.0383962		0.145725								0.144122
									0.0223766		0.13154								0.076539
									0.121507		0.0661588								0.087122
									0.0686309		0.104561								0.130134
									0.0310779		0.0816761								0.110562
									0.0186094		0.0690397								0.028252
											0.0440806								0.020835
									0.196298		0.0173429								0.018296
									0.118268		0.0121782								0.00858
									0.127049		0.00680124								0.09186
									0.108661		0.018488								0.024922
									0.0957653										0.036377
									0.0491708		0.190334								0.021889
									0.0619289		0.165535								0.031718
									0.164543		0.0887789								0.010797
									0.174748		0.0618721								0.018742
									0.143949		0.0942857								0.036371
									0.0921752		0.0841826								0.015355
									0.0328044		0.0349855								0.16762
									0.102505		0.0259119								0.136953
									0.095908		0.0135049								0.116642
									0.100007		0.190709								0.130824
									0.0282918										0.164791
									0.192988		0.181965								0.140351
									0.189227		0.131013								0.119804
									0.164103		0.0292778								0.112343
									0.136972		0.0395987								0.025325
									0.105501		0.0719356								0.053931
									0.112775		0.03505								0.026105
									0.0612006		0.01407								0.016832
									0.0260948		0.0153032								0.137599
									0.0416279		0.0687674								0.147467
									0.0210124		0.014433								0.133951
									0.0149279										0.076058
									0.161929										0.075274
									0.176938										0.037891
									0.159741										0.016785
									0.106504										0.0084
									0.0460879										0.026651
									0.0129975										0.009355
																			0.018716
									0.188107
									0.148249										0.131355
									0.116534										0.102447
									0.140608										0.150494
									0.0441848										0.138282
																			0.122454
									0.151794										0.109866
									0.117489										0.092984
									0.0569677										0.048591
									0.030668
									0.0143857										0.056011
									0.186158										0.038445
									0.151642										0.026539
									0.137487										0.024724
									0.118387										0.030358
									0.052376										0.014417
									0.0655819										0.133522
									0.0688022										0.122986
									0.0928554										0.107114
									0.0711814										0.056391
									0.0579639										0.040285
									0.0373115										0.083645
									0.0339587										0.046559
									0.0308753										0.023939
									0.0215578										0.018215
									0.164613										0.016397
									0.173537										0.095673
									0.147407										0.123062
									0.125136										0.118684
									0.0994181										0.145705
									0.0886558										0.12417
									0.0771377										0.0971
									0.0692333										0.049823
									0.0417649										0.089072
									0.010175										0.076824
									0.034881										0.063419
									0.0128703										0.03072
									0.023819										0.011437
									0.0110716										0.048233
									0.0130302										0.058309
																			0.048532
																			0.034562
																			0.023461
									0.0529401										0.015823
									0.0447685										0.01711
									0.0207439										0.035439
																			0.045971
																			0.030362
																			0.023724
																			0.016964
																			0.006463
									0.162272										0.142267
									0.0324221										0.099017
									0.00782
									0.159763
									0.178092
									0.164789
									0.151116
									0.110114
									0.136251
									0.0770025
									0.0836998
									0.12776
									0.116807
									0.105497
									0.0955349
									0.0349565
									0.132813
									0.12034
									0.109006
									0.0578527
									0.0129682
									0.0689381
									0.0760836
									0.046968
									0.0245745
									0.191557
									0.163597
									0.165359
									0.139155
									0.106664
									0.158722
									0.186268
									0.174368
									0.14182
									0.153503
									0.0849436
									0.102334
									0.0784063
									0.0651261
									0.0680467
									0.0498909
									0.0395428
									0.179554
									0.161226
									0.0800679
									0.0143809
									0.193273
									0.188752
									0.103121
									0.17218
									0.142923
									0.114077
									0.009922
									0.0351993
									0.117979
									0.106854
									0.0860611
									0.0700829
									0.0757062
									0.0518359
									0.04895
									0.0577858
									0.0263508
									0.0205696
									0.157497
									0.177139
									0.188437
									0.179849
									0.163374
									0.0778791
									0.0815811
									0.0529571
									0.0147541
									0.0195324
									0.117656
									0.17283
									0.156496
									0.116105
									0.10396
									0.0820686
									0.0718004
									0.181189
									0.0493102
									0.0419884
									0.028286
									0.19858
									0.0322022
									0.0108666
									0.0725451
									0.0443659
									0.0158912
									0.0562388
									0.0619562
									0.0267424
									0.0109957
									0.006593
									0.153382
									0.153569
									0.159517
									0.13479
									0.0264221
									0.0682518
									0.075845
									0.0520515
									0.0417701
									0.188465
									0.135987
									0.124766
									0.106652
									0.0635929
									0.0415461
									0.151769
									0.125808
									0.103445
									0.092587
									0.0741753
									0.0501337
									0.1912
									0.175276
									0.167856
									0.00890591
									0.194844
									0.141478
									0.160274
									0.0499692
									0.139136
									0.0425785
									0.100314
									0.0984646
									0.05852
									0.0685751
									0.0446116
									0.0270601
									0.131324
									0.061007
									0.0444952
									0.0278252
									0.0275158
									0.00849856
									0.0886013
									0.0348089
									0.0583396
									0.167561
									0.178977
									0.163311
									0.151213
									0.134389
									0.127691
									0.120115
									0.0297553
									0.0140303
									0.191345
									0.175423
									0.163413
									0.158671
									0.195254
									0.177326
									0.161224
									0.156377
									0.135399
									0.123682
									0.121642
									0.102919
									0.0993615
									0.0844305
									0.0511567
									0.0107028
									0.0476579
									0.0300871
									0.19884
									0.178157
									0.0612052
									0.0383545
									0.0313045
									0.0182231
									0.161075
									0.148416
									0.148116
									0.122676
									0.0990239
									0.0364939
									0.0148729
									0.100591
									0.102049
									0.0122569
									0.177171
									0.146982
									0.0266959
									0.0345912
									0.0207786
									0.0105364
									0.190492
									0.167377
									0.0799557
									0.0796973
									0.0558319
									0.0337694
									0.0367062
									0.0208233
									0.0177326
									0.0434191
									0.0261556
									0.0236976
									0.00885501
									0.126469
									0.105864
									0.0800304
									0.0816588
									0.0140321
									0.114125
									0.124157
									0.0963561
									0.107604
									0.0832897
									0.012476
									0.125133
									0.102697
									0.0881272
									0.0622764
									0.0276561
									0.0221863
