# Supplementary material for: GABAB receptor auxiliary subunits modulate Cav2.3-mediated release from medial habenula terminals
Source: eLife. 2021 Apr 29;10:e68274. doi: 10.7554/eLife.68274 (PMC8121548; doi:10.7554/eLife.68274)
Supplement: Figure 3—source data 1. [file elife-68274-fig3-data1.xlsx]

## Sheet: Sheet1
	Panels A - E
		Distance from AZ	GABAB1 lat	GABAB1 ros	Cav2.3 ros	Cav2.3 lat	KCTD8 ros	KCTD8 lat	KCTD12 ros	KCTD12 lat	KCTD12b ros	KCTD12b lat
	AZ	0	0.241349	0.256359	0.792406	1	0.555917	0.381628	0.373823	0.006563	1	0.006216
	50	50	0.948888	1	0.601063	0.689154	1	0.908425	1	0.065508	0.980573	0.005763
	100	100	0.635957	0.824176	0.354473	0.516865	0.77619	0.600733	0.212121	0.009358	0.636867	0.005763
	150	150	0.565295	0.791209	0.231178	0.153145	0.661905	0.468864	0.166667	0.028075	0.601486	0
	200	200	0.302837	0.659341	0.077059	0.153145	0.495238	0.483516	0.181818	0.018717	0.272943	0
	Panel F
		Distance from AZ	GABAB1 lat	GABAB1 ros	Cav2.3 ros	Cav2.3 lat	KCTD8 ros	KCTD8 lat	KCTD12 ros	KCTD12 lat	KCTD12b ros	KCTD12b lat
	AZ	0	2.7801	2.953	4.35723	5.49874	9.72855	6.67849	5.87437	0.103139	16.2167	0.100805
	50	50	10.9302	11.519	3.30509	3.78947	17.5	15.8974	15.7143	1.02941	15.9016	0.093458
	100	100	7.32558	9.49367	1.94915	2.84211	13.5833	10.5128	3.33333	0.147059	10.3279	0.093458
	150	150	6.51163	9.11392	1.27119	0.842105	11.5833	8.20513	2.61905	0.441176	9.7541	0
	200	200	3.48837	7.59494	0.423729	0.842105	8.66667	8.46154	2.85714	0.294118	4.42623	0
