# Supplementary material for: GABAB receptor auxiliary subunits modulate Cav2.3-mediated release from medial habenula terminals
Source: eLife. 2021 Apr 29;10:e68274. doi: 10.7554/eLife.68274 (PMC8121548; doi:10.7554/eLife.68274)
Supplement: Figure 4—source data 1. [file elife-68274-fig4-data1.xlsx]

## Sheet: Sheet1
		Panel F
		Density		Area
		WT	Cav2.3 KO	WT	Cav2.3 KO
		106.066	3.68083	0.056878	0.069134
		106.791	5.6084	0.061598	0.048174
		188.864	0.798696	0.061614	0.042608
		189.606	3.52976	0.043673	0.042656
		Panel G
		AZ		PSD		AZ + marker
		AZ Area	%	PSD area	%	AZ Area	%
		0.026583	2.17391	0.01865	1.47059	0.028381	1.25
		0.030794	4.34783	0.024715	2.94118	0.029635	2.5
		0.036881	6.52174	0.025192	4.41176	0.031686	3.75
		0.037341	8.69565	0.02615	5.88235	0.032432	5
		0.040644	10.8696	0.026534	7.35294	0.033917	6.25
		0.042548	13.0435	0.027556	8.82353	0.035259	7.5
		0.045027	15.2174	0.028485	10.2941	0.036556	8.75
		0.046056	17.3913	0.028749	11.7647	0.037438	10
		0.046478	19.5652	0.030243	13.2353	0.03832	11.25
		0.046649	21.7391	0.031445	14.7059	0.03834	12.5
		0.050457	23.913	0.032101	16.1765	0.03945	13.75
		0.0531	26.087	0.033049	17.6471	0.040215	15
		0.053499	28.2609	0.033666	19.1176	0.040298	16.25
		0.054886	30.4348	0.033756	20.5882	0.042621	17.5
		0.056772	32.6087	0.034864	22.0588	0.042723	18.75
		0.058185	34.7826	0.035254	23.5294	0.04377	20
		0.058523	36.9565	0.03641	25	0.04431	21.25
		0.058598	39.1304	0.037643	26.4706	0.044451	22.5
		0.059221	41.3043	0.038421	27.9412	0.045001	23.75
		0.06124	43.4783	0.038859	29.4118	0.045259	25
		0.063167	45.6522	0.042383	30.8824	0.04564	26.25
		0.064572	47.8261	0.042498	32.3529	0.047315	27.5
		0.066406	50	0.044067	33.8235	0.050229	28.75
		0.068793	52.1739	0.044131	35.2941	0.050551	30
		0.06988	54.3478	0.044706	36.7647	0.052108	31.25
		0.071743	56.5217	0.046083	38.2353	0.052247	32.5
		0.0718	58.6957	0.051845	39.7059	0.053819	33.75
		0.076433	60.8696	0.05251	41.1765	0.054508	35
		0.081026	63.0435	0.056887	42.6471	0.056074	36.25
		0.087722	65.2174	0.05939	44.1176	0.057061	37.5
		0.090501	67.3913	0.061077	45.5882	0.057569	38.75
		0.092134	69.5652	0.062392	47.0588	0.059087	40
		0.093119	71.7391	0.063653	48.5294	0.062137	41.25
		0.09711	73.913	0.065914	50	0.06334	42.5
		0.101044	76.087	0.067959	51.4706	0.063796	43.75
		0.105918	78.2609	0.068027	52.9412	0.063849	45
		0.107557	80.4348	0.069767	54.4118	0.064803	46.25
		0.109871	82.6087	0.070683	55.8824	0.064807	47.5
		0.115638	84.7826	0.070952	57.3529	0.06726	48.75
		0.116516	86.9565	0.072187	58.8235	0.067966	50
		0.123005	89.1304	0.074522	60.2941	0.069958	51.25
		0.12315	91.3043	0.075068	61.7647	0.070141	52.5
		0.128292	93.4783	0.081547	63.2353	0.070894	53.75
		0.143145	95.6522	0.084846	64.7059	0.072225	55
		0.19961	97.8261	0.086632	66.1765	0.074167	56.25
		0.25879	100	0.091948	67.6471	0.074274	57.5
				0.09339	69.1176	0.074869	58.75
				0.094628	70.5882	0.075571	60
				0.095604	72.0588	0.077793	61.25
				0.097164	73.5294	0.078707	62.5
				0.097266	75	0.079328	63.75
				0.108942	76.4706	0.082303	65
				0.109617	77.9412	0.084271	66.25
				0.109901	79.4118	0.087094	67.5
				0.116014	80.8824	0.089344	68.75
				0.11876	82.3529	0.096537	70
				0.120654	83.8235	0.099664	71.25
				0.122982	85.2941	0.099721	72.5
				0.125281	86.7647	0.100617	73.75
				0.131554	88.2353	0.100631	75
				0.156679	89.7059	0.102268	76.25
				0.156919	91.1765	0.102324	77.5
				0.157374	92.6471	0.108032	78.75
				0.157615	94.1176	0.108098	80
				0.170703	95.5882	0.108516	81.25
				0.17128	97.0588	0.110723	82.5
				0.191451	98.5294	0.112974	83.75
				0.250503	100	0.115453	85
						0.115961	86.25
						0.125439	87.5
						0.131981	88.75
						0.133601	90
						0.13615	91.25
						0.138779	92.5
						0.144755	93.75
						0.149098	95
						0.150565	96.25
						0.155904	97.5
						0.15679	98.75
						0.166877	100
