# Supplementary material for: GABAB receptor auxiliary subunits modulate Cav2.3-mediated release from medial habenula terminals
Source: eLife. 2021 Apr 29;10:e68274. doi: 10.7554/eLife.68274 (PMC8121548; doi:10.7554/eLife.68274)
Supplement: Figure 5—source data 1. [file elife-68274-fig5-data1.xlsx]

## Sheet: Sheet1
	Panel B left + middle graph
	particle #		density		particle #		density		particle #		density		particle #	density
	Cav2.3 rostral	Cav2.3 lateral	Cav2.3 rostral	Cav2.3 lateral	GABAB1 rostral	GABAB1 lateral	GABAB1 rostral	GABAB1 lateral	KCTD8 rostral	KCTD8 lateral	KCTD8 rostral	KCTD8 lateral	KCTD12b rostral	KCTD12b rostral
	4.06	3.903	86.42	85.59	7.107	9.056	139.8	147.3	4.743	3.139	80.57	70.17	3.676	73.32
	4.308	5.032	85.86	85.93	9.205	7.202	176.4	119.7	5.346	3.923	81.97	74.94	3.047	48.48
	5.671	4.528	152.6	105.5	10.6812	7.35714	189.292	126.249	4.216	4.34	69.58	74.92	2.705	44.99
	4.885	4.577	89.49	89.17									3.231	59.06
	10.61	7.226	96.93	121.2
	7.541	6.83871	117.7	120.817
	5.859		93.92
	6.5		107.6
	6.41		111.6
	6.10811		118.317
	Panel B right graph
	GABAB1 rostral	GABAB1 lateral	KCTD8 rostral	KCTD8 lateral	KCTD12b rostral
	97.619	98.6111	100	97.2222	100
	100	100	96.1538	96.1538	92.1875
			98.0392	98.1132	97.7273
					100
	Panel C
	rostral Cav2.3		lateral Cav2.3		rostral GABAB1		lateral GABAB1		rostral KCTD8		lateral KCTD8		rostral KCTD12b
	Real NND	Simulated NND	Real NND	Simulated NND	Real NND	Simulated NND	Real NND	Simulated NND	Real NND	Simulated NND	Real NND	Simulated NND	Real NND	Simulated NND
	36.8229	95.282	48.4995	124.481	113.674	149.376	46.5242	62.5422	24.7761	100.513	21.1319	97.3522	37.6219	77.6982
	62.8123	106.107	60.7364	109.672	25.5545	73.7799	41.705	94.8691			58.6636	67.8006	31.302	80.388
	16.648	83.7114	22.9527	88.9158			30.6463	143.331	67.9599	86.8979	53.1893	100.389	98.5041	142.761
	29.1729	82.0556	30.8115	66.1028	47.9677	68.6169	93.029	79.2836	71.7631	160.99	131.805	121.113	146.019	157.597
	47.3008	53.5653	103.191	115.53	84.1709	98.0886	60.1175	64.6405	30.2785	54.3209	30.6553	174.324	36.2764	76.4068
	60.2296	111.991	18.3168	103.565	54.7355	117.658	48.9632	46.9113	145.563	161.464	44.1969	151.219	37.8547	92.6084
	139.314	127.233	101.65	133.868	74.3222	63.5436	32.257	47.6156	20.4803	125.326	198.144	118.542	109.302	129.248
	104.017	138.134	87.3871	106.06	35.4012	54.2079	82.5396	85.4604	36.1667	177.068	42.119	147.05	86.1596	99.5667
	52.6769	81.2598	30.5138	124.582			38.4633	100.283	72.5781	97.5528	97.01	100.088	37.1633	45.1174
	11.6797	143.16	33.3694	58.3623	39.7354	44.9747	34.6102	62.3401	36.6085	91.843			58.6245	74.2095
					36.0194	75.9411	36.9266	58.4217	42.6872	117.414	40.8232	117.825	32.8171	142.301
	313.011	159.947	69.5501	119.855	80.2709	88.0127	55.4626	99.4875	30.4261	95.4216	112.495	117.973
	78.3915	90.1047	84.4125	112.922	266.842	162.438	48.3286	64.2038	337.615	181.932	62.6739	70.455	261.664	173.021
	36.6843	52.0863	165.348	205.757	40.2418	66.4601	33.2917	43.5663	66.0421	79.6462	23.0308	62.3857	43.8185	51.4293
	48.5974	92.9481	176.525	276.686	31.2624	49.9169	31.385	34.7542	84.9034	110.113	43.5211	65.3532	39.7268	230.361
	39.2909	57.5102	18.7886	95.8721	43.2354	63.6047	26.1193	38.5066			33.5912	81.2773	21.593	109.861
	32.1621	84.8441	48.8728	108.325	26.7324	124.008	41.514	76.2612	24.8117	80.7609	73.2348	114.115	77.114	108.995
	21.5927	41.3204			48.1848	57.405	24.2596	61.8996	35.7194	71.8316	28.3942	83.6891	40.475	127.649
	34.748	74.9251			49.7716	74.603	61.4547	82.2534	47.626	72.7603	76.9303	205.14	23.5603	137.718
	46.7757	68.5314	45.9937	149.887	26.2323	50.6875	46.7898	59.7545	121.457	114.672
	62.8901	126.581	52.3963	104.945	61.9556	102.045	59.3142	67.016	27.4492	80.1015	153.444	149.313	23.5816	96.6406
	39.2758	55.4007	165.283	138.575			73.1514	69.558	63.6378	106.663	31.0908	62.3564	48.5903	109.533
	22.437	70.6928	70.721	100.67	31.5603	40.6122	32.2345	60.5363	53.9467	104.173			170.455	128.059
	27.9242	119.439	15.6963	76.2738	35.4326	58.6739	31.2972	50.4386	98.2031	117.317	46.492	60.5313	26.6767	66.2181
	12.5529	141.278	13.3654	100.812	54.244	71.711	85.7589	85.3193	48.0706	68.6123			25.9622	73.0346
	16.6081	31.4178	34.8435	145.143	65.071	79.7043	61.846	74.3146	59.7219	70.8958	84.3272	163.468	23.0862	84.5577
	31.0735	42.3725	48.2394	133.164	16.4218	51.8192	31.9602	55.2906	143.744	139.541	60.816	144.251	74.9531	107.275
	36.0539	44.862	16.3204	105.535	23.0776	60.0606	28.1563	41.4905	79.5433	96.6887	29.9911	86.861	48.1846	66.0359
	37.7509	54.8548	30.6423	85.3152	45.4213	45.0374	47.8048	59.4039	53.4866	82.4551	28.0793	53.6077	204.14	132.149
	22.3992	92.014	48.0954	76.5084	49.92	65.2024	66.045	101.382	38.0848	52.6055			59.6231	95.6068
	84.498	103.537	62.1868	112.594	41.1795	58.6939	34.5152	51.2506	32.1374	59.3801			80.8696	105.577
	31.5955	43.6651	24.7392	81.2952	55.2967	77.47	30.5449	91.2668	78.9939	91.966	69.4012	78.9123	72.7537	117.078
	34.2616	62.5154	36.7816	151.171	33.0094	59.8237	45.7957	73.6793	36.6339	87.2662	109.91	87.0452	42.1037	57.4053
	32.4872	72.0407	56.9029	59.8912	72.7307	81.6482	52.1643	123.336	32.8048	62.2928	31.6158	106.478	51.4752	150.566
	84.9752	117.898	29.4708	63.1889	138.532	118.566			56.2791	73.9094	38.1252	76.3343	143.726	123.932
	63.885	62.1858	109.399	103	49.2254	59.7504	299.095	143.728	61.3264	71.7292	19.4106	96.789	28.8349	76.5879
	21.5146	43.1819	22.1752	34.2587	83.2314	84.4661	36.8376	62.7826	44.5085	88.8675			99.8182	171.032
	55.6858	118.427	15.8677	27.8206	45.6625	82.2751	24.1786	91.7957	43.1599	61.0181			72.3568	113.872
	20.1972	62.355	28.3617	112.8	27.696	91.8663	30.7732	42.9915	89.362	82.4001
	66.0011	115.606	20.1145	38.3179	101.403	111.027	26.9571	35.3771	37.2219	63.4469	74.2923	101.807
	36.5849	54.3956	20.8198	67.61	58.016	59.6057	23.7393	37.606	44.4774	135.843	36.343	64.7399	92.8377	124.828
	54.6602	78.81	35.809	82.3888	39.1933	56.8642	31.6439	37.2662	55.9933	68.6985	64.729	97.7237	48.8724	80.6477
	14.2441	152.416	84.661	94.4176			51.9326	61.637	71.041	71.3641	76.1202	159.724	56.1523	92.7354
					25.5372	35.9561	35.7984	87.8825	47.1969	64.9501	72.0362	90.5237	97.4802	166.717
	31.8825	49.9171	31.044	72.9361	45.7539	66.1128	31.9635	35.5671	77.9239	75.0042	127.413	135.691	17.6352	184.076
	24.3254	68.9665	59.4473	102.225	24.1945	36.6217	31.6226	39.0225	52.6497	72.9599	24.8819	65.3409	116.707	130.61
	91.8395	150.772	68.8156	107.137	62.6071	61.0566	35.5684	49.8539	83.2252	85.2473	22.4978	83.7617	68.5188	85.2871
	64.181	64.582	63.1784	151.459	39.6197	78.377	42.9437	52.001	47.3819	83.9561	24.2243	86.9035	90.1087	79.9253
	21.1776	63.9042	52.1	119.15	41.8445	55.6923	32.5167	46.6851	26.8704	85.0238	30.7641	70.1677	230.779	162.228
	24.2562	66.3017	24.3968	154.577	34.0361	54.3835	38.4385	147.406	160.307	143.227	41.7408	61.0608
	33.3682	227.559			38.5987	51.6847	23.8608	38.0716	38.3624	146.263	88.7759	104.978	98.5041	163.903
	63.8156	103.125			30.3151	56.9132	24.1634	54.6531	41.9582	85.0171	22.2406	69.1761	27.0145	175.118
	18.1672	82.4433	28.6328	85.4711	64.0926	122.496	87.2626	99.5197	153.965	127.276	21.1159	65.0435	35.6699	111.506
	31.531	48.4223	29.5035	73.8108	24.5956	54.7494	27.707	50.0565	58.6716	101.32
	14.044	187.183	14.1819	55.2941	32.2784	37.7113	23.5507	30.7803	31.2208	111.573	426.252	182.353	171.901	191.169
	30.0908	82.7094	23.7205	57.2512	23.2232	59.9983	62.8588	92.9181	54.8386	95.9719	85.3594	122.357
	28.1406	90.4406	42.7573	95.82	70.5353	100.435	57.3171	87.0089	35.0538	59.781	19.5583	89.4349	45.8869	118.75
	89.1701	117.474	13.6753	97.7267	47.5985	48.6137			79.8548	107.839	17.5781	115.547	134.475	135.877
	25.5341	48.8715	27.2117	205.36	24.6581	35.9118	48.5905	65.8204	42.2608	112.317	26.0733	107.415	29.3611	104.671
	80.063	148.389	22.976	35.4953	63.4391	66.9387			29.4783	108.781	67.9521	115.805	49.1173	69.5422
	47.221	94.6563	13.4539	97.8003	32.8762	51.3262	32.4523	45.9805	32.5001	69.1689	35.0356	79.1197	64.7785	152.081
	23.4381	51.954	75.6108	120.833	29.7172	56.4295	29.8667	88.3847	76.1768	89.3771	188.44	151.267
	39.3388	80.213	23.0844	192.226	36.0909	97.208	46.3153	67.0572	81.7555	103.658
	184.757	169.699	167.837	127.361	29.8956	50.4906	88.1483	124.32	45.8006	63.5939	111.444	150.043	214.864	186.913
	32.4509	46.1948	37.6498	123.942	42.7637	84.6915	57.4309	87.3947			69.7086	82.5261
	19.4376	50.888	94.5629	112.082	31.5618	54.2987	62.2461	85.338	35.8252	70.6783			23.0201	59.2256
	19.4814	42.9225	39.9043	68.6892			40.4074	57.5482	101.411	93.2567	79.9255	141.866	83.4156	123.279
	98.2663	107.407			24.7558	44.041	53.5975	73.5437	110.595	113.277	26.3436	77.1682	61.7558	128.392
	29.0258	71.008			27.3586	44.8371	36.5248	72.0997	51.9638	79.1504	81.7546	109.243	30.0417	111.402
	20.5899	132.918	139.134	118.844	36.2531	90.7065	64.9036	83.2138	45.0226	61.7319	28.9006	143.014	171.74	193.748
	32.6	97.0102	245.174	139.751	44.7313	76.2826	39.1955	47.7668	116.141	176.783	44.0643	84.9517	19.9549	97.8159
	89.0408	90.0084	18.0121	98.7757	43.2387	101.498	30.5788	83.2687			33.443	106.528	25.7815	83.8398
	76.9796	96.4648	65.4175	95.012	25.4036	88.521	31.6385	44.6394			153.763	175.09	96.7905	143.799
	39.9359	54.9146			50.5352	74.6127					62.7806	109.987	86.7161	127.82
	63.393	71.9769	36.2643	83.322	84.1771	83.4657	24.154	63.0518	60.7456	106.628	70.2495	81.2253
	67.1184	134.893	32.6466	105.374	46.6256	93.3204	44.2488	68.3369	25.3354	51.6462	116.793	164.464	280.162	241.556
	55.005	82.7584	35.2904	58.5791	35.4095	67.6321	64.7985	78.3782	69.3687	74.9793	21.0497	86.3392
	75.8611	86.9698	28.2372	92.7316	65.7774	77.6421	62.9037	71.8301	25.378	100.141	44.0871	67.1503
	29.6994	41.5253	56.9548	99.5642	36.3899	60.3398	63.8921	72.6849	32.5562	61.9516			43.1481	51.9549
	69.2469	71.6171	27.9974	76.6482	88.5397	76.0226	70.5482	116.497	43.5365	101.939	22.7837	56.1153	44.4947	55.8456
	67.7838	154.113	23.1633	106.04	27.8648	45.7306	51.8357	69.7064	49.8543	69.7866	51.0614	106.695	93.2373	91.2587
	53.7154	89.8579	49.9231	138.045	160.273	135.69	44.5172	69.5213	22.9726	171.092	48.4963	67.0563	79.2721	106.852
	39.9888	90.7794	121.225	116.995	31.8807	40.1699	32.5473	65.4765	35.1138	74.9667	12.8747	131.198	21.143	86.1554
	16.5641	60.7349	74.6456	97.5459	41.7	44.0673	19.5168	70.9548	41.2579	97.1241	38.605	106.143
	29.1958	149.321	55.0781	89.6991	38.1352	84.0344	67.4606	100.08	59.958	88.0045	41.7127	50.0913	11.2843	137.375
			68.8202	93.7867	46.6978	61.8163	59.3524	110.914	40.5542	60.3073	22.2809	94.9732
	119.489	102.555	46.0822	81.8314	86.4459	74.4527	48.244	59.106	24.2393	95.0844	64.9494	123.459	187.672	163.298
	24.5263	71.4511	112.797	122.051			32.6282	49.6409	191.509	142.949	27.8125	105.836	54.1681	82.2582
	46.0068	51.998	54.8763	72.384	33.1185	48.3384	74.9488	92.8121	28.8671	41.6595	42.5206	71.787
	78.1527	113.776	54.3244	131.719	39.4835	61.9682	15.7872	83.4466	27.3329	90.7975	102.309	100.263	78.796	89.7392
			22.6526	62.0349	21.8939	35.4696	62.087	70.3197	174.933	193.247	51.0144	151.152	21.1758	90.2313
	28.8998	67.7408	62.9668	100.207	70.5212	60.4985	48.726	64.1934	24.9003	115.8	30.8701	68.7594	47.6533	177.442
	28.1538	71.4891	67.6094	98.3537	31.9872	49.829	50.0955	70.0607	29.0691	59.6994	40.959	65.9183	53.4579	87.506
	77.7797	75.6909			81.9191	103.295	101.297	84.3715	41.3381	74.6863	48.8465	88.602	28.5315	97.5551
	33.8307	69.9279	38.0472	64.1996	32.1259	35.401	25.0705	55.3684	49.1652	90.3888	22.7015	111.511
	19.9591	74.9472			69.1694	70.0548	27.7976	59.4745	102.409	105.492	44.513	139.052	66.0077	112.618
	64.9301	102.952	24.2511	70.278	44.1364	89.0268	99.5562	113.697	37.6596	66.8474	46.1183	60.6634	137.852	120.341
	6.74887	77.1754	34.901	73.8464	36.8167	60.4955	25.8684	59.6138	133.55	158.806	50.2618	79.8765	124.256	141.687
	33.9666	91.8833					32.9606	53.3047	24.8489	143.39	30.608	55.8484	35.7644	92.382
	38.1773	99.0853	119.218	165.754	39.1799	64.7457	107.023	116.685	33.3214	92.7323	70.3858	114.694	23.6384	94.2783
	77.1524	76.1106	40.7118	88.7216	26.3824	38.2357	45.3737	58.8069			27.5734	106.123	23.0707	91.313
	43.1047	96.7258	118.307	174.42	37.203	58.2652	58.0841	100.574	82.4643	98.0879	26.543	58.9051
	26.298	101.327	27.8743	99.1561	53.8416	97.09	47.1429	51.953	107.844	113.941	33.4999	88.8577	68.4408	167.399
	27.9236	44.2555	33.6069	79.795	28.9611	44.4169	46.3054	55.81			37.4964	68.0151	39.8018	73.1062
	20.0715	32.9531			29.6449	41.8191	65.9396	66.7731			49.2337	73.306	41.2717	91.7069
	43.1088	79.601	48.0359	160.355	25.1926	31.3251	27.8905	43.7936	44.9229	86.9108	64.9494	106.996
	55.6936	84.6786	57.7536	70.3052	34.0384	43.0461	41.5373	65.9276	38.5524	69.2441	29.8315	77.274	22.8602	111.608
	43.2065	82.0811	25.3606	34.7082	56.9881	69.098	46.933	76.6413	74.3103	86.3796	58.7335	85.2004	30.2054	163.124
	41.1132	81.2949	41.2216	55.7699	95.0698	92.4049	26.8965	38.6335	66.371	95.928	43.5836	84.1399	23.1766	67.1975
	72.6805	98.892			47.3192	61.9268	41.018	53.9552	33.1458	183.35	99.8072	132.625	213.623	135.893
	25.3836	101.918	47.2204	56.0482	29.1029	34.5249	32.8936	57.3893	18.7158	86.9444	19.7752	74.6725	52.0537	77.5243
	9.68501	139.192	116.361	117.878	64.3882	76.9764	49.3118	53.6403	59.9073	70.9514	60.9919	71.2915	33.9085	97.9364
	63.2823	71.3617	44.2931	54.7006	61.6295	66.4055	55.4191	73.6024	53.8519	114.344	39.8042	125.09
	56.5744	209.041	97.2686	108.103	58.414	69.7191	42.5873	70.1153	53.7797	85.3817	47.0084	80.1259	176.548	192.904
	149.414	174.928	27.9438	123.116	32.1932	40.0898	39.6186	55.8243	28.2519	214.488	21.9249	114.734	50.0951	106.52
	20.095	46.4431	24.8153	41.2492	29.0585	48.9587	54.4037	64.2419	30.2213	133.15	26.6959	88.0849	101.589	124.924
	23.2016	73.5314	46.4908	75.0569	18.5549	73.563	42.9861	79.4441	134.087	133.097
	52.5175	54.1347			38.7986	58.6539	37.364	51.7212			34.0483	101.779	42.2777	141.81
	48.2966	91.4695	28.0543	144.446	32.216	62.71	31.8177	68.9822	327.532	162.02	37.3273	102.528	193.965	145.647
	63.7854	94.0933	256.193	174.527	37.6162	49.5659	36.9661	122.407	56.2759	85.5325	40.2191	73.9803
	12.718	81.9429	58.2481	72.6637	170.593	154.8	93.026	92.5042	28.0787	103.139			61.7099	166.577
	51.0894	81.8079	24.1865	46.4172	22.6714	36.859	74.3733	112.688	14.9628	63.7949			190.414	158.716
	25.7596	149.919	23.7593	72.9443	97.1463	83.8671			35.5833	82.3492			63.7302	96.2599
	27.1339	59.95	107.641	132.163	65.1148	110.22	34.6908	46.6002	34.6143	196.813			87.3354	90.812
	35.8178	102.222	31.707	123.203	31.0304	73.7954	103.473	93.2415	184.04	178.35			70.2425	141.476
	29.1471	132.84	33.1083	71.3839	53.8217	89.1111	82.5661	102.597	86.9267	117.658			40.2084	139.477
	26.503	53.3092	25.596	59.7469	30.1206	51.4153	149.621	110.072	36.7397	103.348			141.344	217.146
	40.5692	69.2762	46.4133	104.047			35.1058	59.1581	87.4883	118.267			171.592	184.58
	27.6457	65.5012	403.655	198.141			35.6087	64.1537	36.6449	87.2028			42.4691	118.288
	18.9502	58.5902	284.831	137.331			80.818	67.0296	45.7937	54.2337
	30.5064	66.8696					47.7693	53.3217	38.0686	180.725			162.918	134.076
	48.6695	87.2993	30.5869	152.285			40.3227	54.9512	57.8095	106.25			36.9406	128.759
	20.2939	73.7824	15.4499	73.9039			94.8357	88.5889	39.7872	62.8524
	33.3762	68.2126	39.3578	74.75			43.6431	64.5493	71.707	80.7258			28.0192	168.689
	31.7531	57.7373	77.2557	93.4526			40.2431	42.6396	68.4085	64.3303			336.829	175.647
	40.781	70.2107	18.321	98.3548			20.3856	39.0296	23.3778	133.157			68.3133	92.3715
	40.7714	119.239	30.8385	56.2054			39.9259	56.8177	114.168	134.944
	34.1989	76.858	28.7447	125.952			53.1	52.3753	95.3825	146.305
	33.0627	56.8154	40.1564	62.4188			30.3708	49.4162	51.3223	60.299			135.545	156.594
	19.9629	60.4326	22.9136	82.8989			43.2196	66.1161	115.414	96.4399			19.8322	186.092
	29.0162	64.7974	207.04	112.7			34.0641	70.9029	87.9336	87.7878			52.7835	110.781
	29.5179	69.9278					38.5239	56.1385	290.231	191.951			285.381	146.544
	43.8052	121.341	66.5202	80.8447			56.2647	53.1608	29.387	101.288			49.4954	82.9636
	23.351	57.5204	21.7363	172.061			38.097	48.6017	42.0098	64.0942			16.5933	54.9038
	54.1237	97.8258	22.0332	48.0704			65.862	69.8048	38.9335	66.8069			127.074	168.004
	46.8928	151.263	26.2426	85.7702			59.0773	68.2638	79.6252	105.936			30.8606	234.169
	57.1849	69.7896	45.1424	93.5912			28.1706	76.4211	98.1887	100.464			96.9983	116.188
	38.9265	157.407	38.2834	73.4783			97.3572	114.582	31.7244	54.9356			81.738	111.778
	37.4839	62.4498	37.4063	72.7099			54.1414	109.902	49.5408	75.9095			65.0318	92.0659
	30.9191	63.6956	23.1217	56.2361			83.7721	130.632	17.1009	105.215			131.85	149.334
	41.3606	51.1704	42.1535	59.6605			58.7032	87.3939	31.762	134.001			50.6274	92.0259
	37.4461	46.8835	47.6729	81.7273			46.4264	64.1807	64.1477	73.8367			143.997	108.685
	17.0802	63.3776	65.3737	69.2718			40.32	69.886					48.752	141.388
	49.2256	91.0825	96.3737	111.275			119.253	87.1964					17.1671	103.056
	22.8159	36.7947	22.3088	120.505			60.5586	89.4551					142.647	158.04
	23.325	75.8521	21.414	165.812			49.5999	66.7658					23.1658	102.96
			49.2101	64.2257			78.2632	102.813					171.019	131.854
	29.0744	54.5525					52.6817	60.5078					61.8299	84.5267
	17.1445	76.907	57.1558	57.846			25.9333	67.9371					114.547	109.15
	59.7738	103.157	42.0204	108.874			42.1352	146.641					36.8761	68.9037
	27.0478	51.047	25.1844	50.1905			64.0339	72.4457					34.6158	130.218
	103.367	92.6498	32.7346	45.4091			66.0803	86.573					56.3513	89.342
	27.3374	88.4011					27.5811	59.3156					106.224	139.739
	32.2335	47.2915	25.494	61.6483			29.5359	67.5397
	52.1156	88.6482	41.4965	103.797			32.3004	44.8297					166.248	159.193
	36.6788	72.8425					52.8476	82.2222					101	106.563
	44.8343	57.6404	57.5129	85.9426			82.7863	134.42
	56.246	70.6899	38.0112	122.501			41.4676	57.5785					32.4542	173.544
	85.1221	97.9222	45.903	68.9799			39.2555	68.8066					47.6639	138.365
	18.8742	68.0701	21.8653	85.5488			150.861	100.541					130.457	136.95
	43.7802	61.0885	35.3758	99.952			38.021	49.2817					57.9996	160.547
	15.8598	161.987											76.5697	123.306
	43.3116	144.211											39.7806	135.122
	35.4799	52.3667											66.0613	86.8203
	48.4156	113.108											88.7477	79.8302
	85.7952	72.7451	59.7935	75.8512									20.0001	93.3406
	18.541	94.622	77.5198	121.319									231.89	130.061
	47.6202	68.4519	43.1211	88.6103									32.9978	115.988
	85.8709	99.9255	147.08	115.292									16.6394	74.2778
	129.068	170.806	19.0646	106.753									34.319	68.2398
	27.6385	83.8968	25.0777	49.6057									21.1824	73.2689
	51.4845	78.2306	51.7976	89.1915									109.598	184.015
	15.9228	59.7328	68.6527	101.185									91.0879	81.9813
	35.2633	121.232	29.7236	68.4786									22.8365	76.79
	15.8494	52.4218	74.3507	74.0959									27.0066	91.3905
			31.9586	72.8651
			79.4545	67.6509
			28.8752	48.373
			46.2488	78.801
			23.0232	59.1258
			72.0276	113.016
	18.0586	73.2452	23.9412	152.898
			50.1708	74.2798
	51.7343	93.3082	146.562	154.682
	56.899	88.2541
	39.8487	107.105	63.4627	86.1077
	41.9305	61.862	35.1249	56.9028
	50.3542	128.631	34.8953	48.667
	70.4989	93.8459	54.5434	65.3477
	63.9319	155.045	27.0443	64.9532
	96.8076	147.741	102.349	153.162
	72.9377	90.9709	60.4296	61.7466
	47.8936	95.5018	55.8197	91.625
	26.394	67.9401
	93.1274	152.201	41.5118	67.6474
	25.952	132.26	256.592	152.893
	34.4891	128.158	111.491	131.841
	50.3305	71.9816	27.3453	62.9679
	28.6556	63.7158	271.558	195.377
			124.334	123.377
	79.6078	98.3655	52.1713	72.3729
	19.0904	48.1185	23.3325	77.997
	46.0606	49.0824	60.506	108.234
	32.2837	66.3218
	35.2281	70.6934	46.8005	72.6202
	38.1483	95.2075	34.0467	59.2832
	30.3319	122.88	38.7282	72.2879
	27.6126	63.3953	33.0156	85.2425
	62.6086	74.8909	14.9318	163.752
	40.5953	67.9042	58.6292	73.8453
	34.6474	54.606	18.1758	63.8036
	46.2556	80.8644	24.8863	131.461
			30.6252	94.8882
	30.4748	55.9936	71.0727	79.8557
	66.7265	83.0395	35.5576	76.3246
	25.5213	46.8982	24.6102	85.7681
	22.9922	59.0254	50.6061	66.0567
	34.2769	58.6491	15.1819	34.5199
	66.9859	100.559	67.2507	144.003
	37.5711	64.8489	22.463	82.8112
	38.9007	52.291	16.772	123.515
	49.319	58.2779	55.3813	106.706
	56.4939	62.5733	34.5452	79.4393
	95.9433	106.079	28.9494	142.487
			114.772	104.453
	52.1129	68.2129	142.126	156.972
	27.0946	69.9508	20.787	108.445
	76.3929	90.4572	41.3784	170.791
	50.3384	72.9725	25.517	107.129
	28.9091	84.9184	154.937	183.962
	27.8983	82.8686
	36.1196	71.8514	27.5765	68.5892
	29.7267	74.9808	20.9895	45.5881
	151.517	132.721	35.6922	47.4383
	56.9365	100.544	21.6898	69.5945
	28.8248	69.1916	23.8804	56.6966
	113.201	98.8975	38.9764	67.7868
	99.5222	99.9374	27.1249	92.8086
	41.1434	50.909	46.6671	85.5637
	95.433	79.9905	27.0908	50.0128
	121.376	152.435	23.0614	59.7258
	25.5535	70.878	23.1182	116.269
	58.9403	86.2877	54.5001	66.6205
	57.4544	62.0092	24.3004	54.0241
	35.9078	98.2181	39.3762	53.6425
	134.447	85.2778	19.2865	43.7749
	47.5271	70.5887	37.9704	67.9009
	56.1633	68.6043	40.3491	89.966
	75.1419	80.0408	23.5102	45.9835
			26.0374	79.2749
	37.172	75.6294	37.7692	63.6866
	37.6646	53.4855	32.6455	45.8396
			34.6565	87.7497
	25.7447	82.6795	51.1762	104.927
	47.8882	65.3512	13.0826	95.5229
	36.8181	45.8461	21.3405	46.4393
	78.8149	101.023	57.7631	89.4654
	55.7884	116.893	51.815	68.9871
	32.3986	92.1224	51.5723	71.0621
	80.1802	107.377	33.7257	83.1785
	40.4946	110.572	25.4961	69.1924
	24.0714	80.9011	23.892	47.4339
	266.533	170.306	39.2298	97.2343
	20.0409	98.3571	36.0262	116.367
	70.0854	108.07	25.1078	79.0624
	22.3925	54.2908	48.9471	78.7837
	20.6827	88.1076
	27.1542	99.2761	46.8604	111.346
	19.2269	70.4602	23.3182	75.8337
	21.8723	41.605	53.87	102.803
			20.9351	79.9525
	17.0658	197.046	57.4515	81.4141
	67.4352	111.103	113.676	120.096
	23.6517	146.68	51.1776	118.092
	12.9451	69.486	31.9854	57.5831
	27.8512	112.887	18.1278	32.8337
	23.8883	54.7294	43.381	57.8861
	78.7991	118.456	21.1896	89.7131
	105.001	134.965	83.1459	107.191
	64.8607	108.286	52.2288	144.77
			30.1492	40.5195
			32.4164	57.7883
	11.6528	73.6109	43.9216	82.1029
	57.7935	72.5907	20.9834	75.2508
	38.942	65.1962	77.4251	89.0627
	50.026	61.9591
	28.7907	72.4973
	59.5703	69.8834
	38.6435	60.6673
	39.7523	51.972
	45.2231	87.4947
	66.5729	63.2914
	49.1231	56.1497
	27.8886	54.3236
	26.1322	53.4602
	36.9191	65.5329
	26.2945	57.6318
	28.505	41.3738
	23.6152	41.7101
	38.3724	64.6635
	41.8462	72.6213
	31.6568	40.0991
	36.8309	61.8147
	32.8736	70.6056
	29.8347	44.9264
	30.038	48.8535
	24.4525	61.455
	38.6465	49.288
	46.5625	51.1728
	153.196	111.017
	22.6868	43.6872
	20.6386	33.156
	37.5593	53.679
	66.3445	94.6764
	33.4919	42.9758
	26.0388	69.5651
	48.6039	66.0996
	30.429	39.3456
	40.272	81.1917
	75.4079	84.4665
	37.9206	77.9111
	35.7596	57.9078
	26.9549	61.9055
	137.488	141.585
	50.3712	72.8823
	24.9658	42.8427
	35.9146	53.2696
	29.473	44.8054
	53.434	72.2207
	44.4063	98.5768
	74.6193	85.0947
	33.8863	48.97
	50.2603	59.8598
	25.1366	150.384
	9.22586	57.5179
	26.5183	120.44
	69.0583	82.5337
	76.0853	87.9442
	66.4717	78.9106
	39.1123	95.8861
	33.052	114.276
	15.8281	118.486
	17.5066	100.976
	99.464	95.6408
	68.8157	121.067
	165.487	103.033
	15.3015	88.6384
	17.1106	72.5996
	29.8404	76.9203
	28.9995	73.6101
	26.6874	136.921
	14.6265	94.1556
	20.5212	57.0524
	91.939	115.078
	27.1968	115.915
	21.5644	138.725
	52.683	92.6669
	18.5036	52.699
	40.6322	152.479
	38.4298	137.921
	24.4332	66.7302
	59.9872	97.1483
	17.5118	74.7416
	39.4885	98.0401
	21.944	152.43
	40.7017	60.0622
	23.8279	87.305
	22.9527	129.949
	34.4534	53.5223
	13.1679	94.6683
	27.0804	73.888
	234.217	179.014
	36.2146	102.13
	48.9226	104.739
	17.9485	74.1472
	23.3484	50.7352
	27.8639	122.984
	37.9644	85.4927
	21.5915	93.0966
	50.6268	87.8253
	20.3968	116.671
	45.9355	110.202
	32.114	82.2172
	286.562	144.224
	35.0383	82.1479
	31.1008	102.788
	38.508	136.596
	76.3631	85.4539
	77.2014	82.0324
	25.172	80.0026
	40.5233	57.0122
	244.507	196.599
	33.241	109.666
	67.4534	120.163
	29.0506	75.2662
	81.6388	112.25
	18.3487	87.0036
	58.7971	59.1858
	55.9225	107.882
	21.3529	142.328
	28.2578	64.5462
	18.232	93.8043
	29.5967	86.9009
	54.0768	115.426
	31.531	73.9518
	24.9366	51.4947
	50.5758	108.757
	17.7078	93.7872
	38.2052	88.8214
	11.0393	58.681
	29.3816	79.0345
	57.1868	68.956
	40.2435	83.8077
	153.04	149.616
	48.0479	58.7963
	77.2615	63.8902
	42.2183	70.8024
	24.1973	59.9829
	21.5772	53.4039
	47.1994	131.663
	22.9638	134.356
	37.0656	66.4358
	33.1242	87.0046
	107.459	148.076
	28.5646	92.864
	193.016	157.73
	21.953	69.383
	26.3547	104.281
	34.5531	115.09
	58.1476	93.5268
	28.5224	82.9696
	37.2721	78.242
	15.0689	80.8266
	43.3206	77.6196
	59.1352	104.483
	22.3273	73.0213
	80.5005	124.835
	38.7623	130.57
	85.1021	103.334
	45.4587	79.6628
	32.7029	45.6537
	40.7736	85.972
	23.7082	95.1828
	51.1055	119.999
	48.9328	91.9511
	57.1689	89.1143
	107.077	136.04
	80.6125	121.186
	128.631	121.154
	31.8759	112.199
	22.256	37.2286
	17.63	106.896
