# Supplementary material for: GABAB receptor auxiliary subunits modulate Cav2.3-mediated release from medial habenula terminals
Source: eLife. 2021 Apr 29;10:e68274. doi: 10.7554/eLife.68274 (PMC8121548; doi:10.7554/eLife.68274)
Supplement: Figure 6—figure supplement 1—source data 1. [file elife-68274-fig6-figsupp1-data1.xlsx]

## Sheet: Sheet1
Panel B		EPSC amplitude (% of baseline)
		WT													KCTD8 KO									KCTD12b KO												KCTD8/12b dKO
		Mouse1	Mouse2	Mouse3		Mouse4		Mouse5	Mouse6	Mouse7	Mouse8			Mouse9	Mouse1		Mouse2		Mouse3			Mouse4		Mouse1			Mouse2		Mouse3	Mouse4			Mouse5			Mouse1	Mouse2	Mouse3	Mouse4		Mouse5	Mouse6		Mouse7
	Time (min)	Cell1	Cell2	Cell3	Cell4	Cell5	Cell6	Cell7	Cell8	Cell9	Cell10	Cell11	Cell12	Cell13	Cell1	Cell2	Cell3	Cell4	Cell5	Cell6	Cell7	Cell8	Cell9	Cell1	Cell2	Cell3	Cell4	Cell5	Cell6	Cell7	Cell8	Cell9	Cell10	Cell11	Cell12	Cell1	Cell2	Cell3	Cell4	Cell5	Cell6	Cell7	Cell8	Cell9	Cell10
	1			43.1572		167.772			93.7483	103.383	101.805	128.262	101.782	58.4273	43.7906	48.0573	107.174	88.8253	66.1752	88.6738	74.9683	94.569	27.152	81.5727	100.688	107.191	88.336	74.7848	61.3033	101.673	71.7122	109.489	110.18	85.8251		77.8466	96.4693		48.3292			77.3532	171.68	168.764	107.757
	2		100.153	185.33	114.635	47.9193	91.2772	77.6619	96.6507	115.48	102.692	105.956	101.494	91.7661	30.4067	70.4408	110.207	101.072	127.866	119.983	101.209	151.722	89.6219	85.9328	105.975	117.479	114.719	80.6835	67.8493	90.0658	113.52	68.5606	125.413	107.419	119.675	70.4886	69.7841	75.1184	108.063	61.6499	127.183	131.524	132.672	87.4333	106.534
	3	35.0228	62.2948	89.7943	120.977	103.755	100.582	121.661	104.217	95.1785	95.3275	123.891	109.341	108.874	78.6064	93.3182	92.5309	97.2973	84.8491	95.6999	75.3032	100.443	114.285	103.952	101.418	79.2616	105.758	87.5267	90.9859	82.7097	100.136	93.2037	95.682	120.55	139.552	118.795	101.266	102.189	66.8953	113.376	103.58	86.1161	56.6731	80.0857	78.7462
	4	109.034	129.817	85.5668	76.4372	82.3785	94.2502	91.6931	108.751	87.9857	113.431	108.9	87.9752	122.044	153.635	132.608	83.6394	122.454	107.435	93.0761	117.076	105.646	131.972	121.656	105.475	112.366	109.093	126.662	141.669	109.682	115.689	92.1858	92.7514	87.0536	65.3969	161.797	137.149	129.098	81.0653	98.0642	71.8801	100.231	75.3699	67.6798	106.437
	5	155.944	107.735	96.1516	87.9518	98.1753	113.891	108.984	96.6331	97.9733	125.987	59.2288	91.2791	118.888	193.561	155.576	106.448	90.3511	113.675	102.567	131.443	47.6209	136.969	106.887	86.4427	83.7023	82.0935	130.343	138.193	115.87	98.9432	136.561	75.9741	99.152	75.3754	71.073	95.3311	93.5944	195.648	126.909	97.3563	104.775	63.6055	96.0376	100.527
baclofen start	6	743.257	113.781	123.08	83.7994	140.615	291.74	105.666	89.0832	372.781	165.308	447.385	200.98	162.478	250.245	371.068	128.064	233.451	266.087	142.413	69.2682	109.153	121.429	291.046	75.195	67.6006	99.5311	144.671	101.832	97.9263	83.2802	106.043	98.3605	333.5	200.68	148.702	140.195	209.08	56.1272	82.5041	306.999	263.289	110.193	604.182	121.593
	7	844.744	162.224	187.545	155.347	265.987	336.895	89.1432	180.213	1987.69	860.5	875.901	241.435	392.791	400.673	740.413	176.218	825.023	304.89	337.168	138.68	532.625	285.704	1251.14	93.5136	206.887	148.29	287.737	304.479	166.405	243.066	158.771	171.449	986.756	273.861	262.099	247.105	402.953	271.528	193.16	536.424	204.1	685.26	293.792	157.698
	8	900.097	123.7	288.913	163.411	739.552	399.084	311.366	235.369	1958.11	1165.01	1069.69	259.472	388.052	420.957	594.453	206.476	955.069	328.733	390.953	343.147	595.383	401.788	1851.57	116.394	326.228	242.645	300.457	386.572	179.495	272.42	447.083	251.69	1170.71	279.785	265.009	249.848	407.206	279.936	318.288	854.141	376.936	890.061	497.913	256.902
	9	1093.86	252.579	318.326	207.748	794.253	356.923	330.454	237.781	1221.39	527.919	499.039	238.841	219.437	361.548	500.442	205.351	876.376	307.931	370.134	792.516	671.793	379.698	1569.29	117.362	382.423	247.378	290.33	414.009	190.704	251.804	170.963	230.041	900.778	325.003	287.296	270.86	504.121	371.004	287.489	685.229	345.99	904.937	509.839	283.838
	10	1124.29	389.098	214.056	220.279	1132.52	343.088	450.971	166.26	386.344	110.075	570.703	176.008	157.687	449.167	604.789	213.057	614.761	295.511	293.758	778.902	714.032	320.706	419.087	118.526	232.18	140.644	282.05	264.03	168.312	156.041	99.2255	198.006	577.925	359.105	301.462	284.215	403.132	315.286	93.2168	467.062	289.089	661.011	678.051	228.079
	11	940.46	428.71	207.902	197.112	741.473	401.529	419.775	159.828	150.641	80.7256	676.479	153.938	84.5841	233.632	508.061	239.666	633.302	277.655	152.916	761.091	552.39	204.788	197.906	79.944	70.4567	98.9311	137.512	201.868	116.531	85.0898	91.1359	159.173	449.508	140.561	250.601	236.264	369.81	520.667	123.488	196.613	228.33	292	726.037	161.998
	12	958.662	288.284	197.583	249.847	577.008	334.333	405.062	135.319	162.253	53.2885	548.711	111.362	60.4825	130.336	559.076	191.956	617.856	196.809	153.954	694.425	368.224	159.151	151.122	71.4522	112.235	112.609	93.2968	88.6431	128.702	81.4086	86.4521	127.637	211.559	89.2275	295.813	278.89	376.883	247.337	64.9425	160.687	138.144	236.292	477.521	149.853
	13	827.789	279.996	156.862	217.121	266.795	329.699	448.049	121.638	124.112	84.4885	461.102	80.3264	88.0909	319.224	484.541	205.965	455.407	229.64	82.3821	559.691	510.388	108.291	147.06	68.5209	103.709	106.265	73.0558	81.443	139.065	76.85	80.2574	120.172	146.083	66.1706	304.301	286.892	437.262	576.531	168.583	161.985	191.914	514.447	762.921	123.321
	14	302.919	266.099	151.105	212.652	297.481	339.663	234.173	97.3537	149.637	97.6849	455.768	91.7746	83.3678	392.082	561.449	206.041	410.511	209.593	59.3116	433.372	522.02	80.2901	98.0615	64.0357	97.7784	84.916	78.4363	56.4487	112.904	68.9537	127.45	124.017	116.486	59.8778	274.79	259.07	403.874	343.765	96.8674	208.477	146.071	339.164	278.951	104.199
	15	270.521	214.507	128.529	190.601	200.748	427.636	354.938	103.609	138.994	142.367	594.781	87.589	106.452	337.903	545.812	212.032	346.785	154.015	64.4899	297.828	534.508	99.77	100.601	65.2683	58.1865	97.0567	102.814	56.7821	104.74	68.0999	170.61	128.181	81.6009	41.5621	210.178	198.154	375.109	268.026	160.429	243.54	145.786	168	113.485	134.035
	16	160.629	203.503		173.814	311.856	306.796	249.427	95.3376	150.447	148.354	725.846	82.7135	117.606	341.357	433.312	148.134	297.096	134.444	76.9594	250.733	386.884	80.1299	105.539	102.631	52.4763	68.065	104.683	81.858	135.193	59.4285		148.302	77.6059	63.0158	261.858	246.877	438.183	328.592	194.024	280.904	136.776	223.825	175.495	119.274
	17	159.997	173.099		99.9141	231.999	308.596	306.224	87.7579	131.477	120.999	725.846	82.7135	126.11	108.426	447.852	181.139	217.792	136.786	72.3977	235.017	466.26	106.559	81.6427	101.616	58.871	103.119	86.1274	84.1343	136.663	53.9805		131.316	77.71	49.6848	287.429	270.985	315.289	223.766	145.492	298.826	108.456	170.466	217.808	119.822
	18	135.298			98.3306	206.971	489.509	240.77	84.9633			621.924	80.239	167.104	121.081	617.76	136.471	287.742	97.0052	87.1567	92.7242	501.611	106.783	75.5501	116.496	46.8498	121.574	101.528	97.38	149.493	59.0224		94.921	90.4	63.4921	322.065	303.64	336.918	215.071	147.195	209.039	96.9376	208.425	86.0432	126.119
