# Supplementary material for: GABAB receptor auxiliary subunits modulate Cav2.3-mediated release from medial habenula terminals
Source: eLife. 2021 Apr 29;10:e68274. doi: 10.7554/eLife.68274 (PMC8121548; doi:10.7554/eLife.68274)
Supplement: Figure 6—source data 1. [file elife-68274-fig6-data1.xlsx]

## Sheet: Sheet1
	Panel A
	WT			KCTD8 KO			KCTD12b KO			KCTD8/12b dKO
	Mouse	Cell	PPR	Mouse	Cell	PPR	Mouse	Cell	PPR	Mouse	Cell	PPR
	1	1	5.48132	1	1	2.84889	1	1	2.58168	1	1	1.81622
	2	2	3.54171		2	1.92679		2	0.825167	2	2	2.57519
	3	3	2.24909	2	3	1.935		3	1.78573	3	3	3.72127
		4	1.72247		4	2.07445	2	4	1.28156	4	4	2.17812
	4	5	6.47438	3	5	0.972488		5	1.1914		5	5.03539
		6	3.31161		6	0.873037	3	6	1.06048	5	6	1.89614
	5	7	1.92198		7	1.50454		7	0.742805	6	7	2.25097
	6	8	0.625027	4	8	4.1088		8	0.875483		8	2.49243
	7	9	2.22336		9	2.21694	4	9	1.2345		9	4.00188
	8	10	3.629	5	10	2.69832		10	0.762	7	10	0.712187
	9	11	1.63882	6	11	1.55391		11	1.0037		11	3.6877
		12	0.830179		12	3.66144	5	12	0.955848
		13	0.909232	7	13	1.81065		13	0.996919
	10	14	1.25832	8	14	2.03999		14	1.00734
		15	6.36603		15	0.770657	6	15	0.783357
	11	16	1.6795	9	16	2.66839		16	1.12579
		17	3.49318		17	4.82865	7	17	1.37464
	12	18	1.53273					18	0.904041
		19	1.22836				8	19	0.798832
	13	20	0.444778					20	2.53911
	14	21	2.02417				9	21	1.13864
	15	22	1.08421					22	0.779478
		23	2.29399				10	23	1.58647
	16	24	2.19829				11	24	1.86558
	17	25	2.34355
		26	2.63517
		27	1.46927
	Panel E
	WT				KCTD8 KO				KCTD12b KO
	Mouse	Cell	P	q	Mouse	Cell	P	q	Mouse	Cell	P	q
	1	1	0.167	10.241	1	1	0.071	10.7089	1	1	0.402	14.3617
		2	0.627	8.8765	2	2	0.097	9.49715		2	0.66	12.7723
	2	3	0.299	12.888		3	0.087	24.6477	2	3	0.365	25.1426
		4	0.434	10.528	3	4	0.11	6.86524		4	0.548	14.7346
	3	5	0.117	7.598	4	5	0.206	3.71279	3	5	0.508	8.04197
	4	6	0.102	15.8636		6	0.079	3.84533		6	0.397	30.53
	5	7	0.209	9.59776	5	7	0.197	7.01861	4	7	0.651	20.6106
		8	0.187	7.4122		8	0.102	17.6885		8	0.608	17.0583
	6	9	0.199	7.43768	6	9	0.093	6.627		9	0.239	4.99608
		10	0.374	12.9809		10	0.305	8.84689
	7	11	0.071	49.5241	7	11	0.057	6.88932
		12	0.294	30.0674		12	0.027	18.1916
		13	0.175	15.0304
	8	14	0.231	18.1871
	9	15	0.246	15.5801
	10	16	0.44	18.8327
	Panel F
	LV-EGFP			LV-KCTD8
	Mouse	Cell	PPR	Mouse	Cell	PPR
	1	1	2.68922	1	1	1.73148
		2	0.814274		2	0.391222
		3	2.90999		3	1.11933
	2	4	3.10102		4	1.09436
		5	2.92725	2	5	1.30211
		6	1.30537		6	1.6542
	3	7	2.22296		7	2.01788
		8	2.29141		8	1.77921
		9	1.63879		9	1.25997
		10	2.96145	3	10	1.85976
		11	2.63254		11	1.48925
	4	12	1.73667		12	0.608638
		13	1.81065		13	1.98579
		14	2.35173
		15	2.82056
	5	16	1.9262
		17	0.793203
	Panel G
	KCTD12b KO LV-EGFP Control			KCTD12b KO LV-KCTD12b rescue
	Mouse	Cell	PPR	Mouse	Cell	PPR
	1	1	1.1323	1	1	1.81945
		2	1.91857		2	1.14209
	2	3	1.76744		3	0.516765
		4	1.37267		4	2.88548
		5	1.28167		5	3.16481
		6	1.66876		6	0.596565
		7	1.29787		7	1.94241
	3	8	1.36576		8	3.77096
		9	0.993754	2	9	2.72146
		10	0.900988		10	2.5018
		11	1.48479		11	2.50435
					12	2.5525
				3	13	3.14911
					14	2.86976
