# Supplementary material for: GABAB receptor auxiliary subunits modulate Cav2.3-mediated release from medial habenula terminals
Source: eLife. 2021 Apr 29;10:e68274. doi: 10.7554/eLife.68274 (PMC8121548; doi:10.7554/eLife.68274)
Supplement: Figure 7—source data 1. [file elife-68274-fig7-data1.xlsx]

## Sheet: Sheet1
	Panel B
	Cav2.3		KCTD8		GABAB1
	WT	KCTD12b KO	WT	KCTD12b KO	WT	KCTD12b KO
	0.9189	0.8192	1.059	1.13	0.9456	0.7552
	1.004	1.447	1.087	1.579	1.455	0.9471
	1.259	0.8122	0.9108	1.55	1.49936	0.964448
	1.01	0.703	0.68747	2.53418
	0.9992	0.959	0.475667	3.64737
	1.03392	0.99929
	0.979306	1.77131
	0.854877	0.993932
	Panel C
			KCTD8 ros			KCTD8 lat
		Distance from AZ	Mean	SEM	N	Mean	SEM	N
	AZ	0	1	0.107235	85	0.36792	0.045469	72
	50	50	0.687693	0.062204	85	0.86895	0.076982	72
	100	100	0.487642	0.052961	85	0.5793	0.073919	72
	150	150	0.30896	0.039676	85	0.346807	0.050463	72
	200	200	0.136303	0.029094	85	0.214547	0.03777	72
	Panel D
			control Cav2.3 ros			pre-incubation Cav2.3 ros
		Distance from AZ	Mean	SEM	N	Mean	SEM	N
	AZ	0	0.976756	0.108906	63	0.485564	0.059102	115
	50	50	0.815635	0.141179	63	1	0.123195	115
	100	100	0.233056	0.066993	63	0.436139	0.08056	115
	150	150	0.077673	0.046917	63	0.255322	0.066785	115
	200	200	0.058258	0.043137	63	0.138243	0.048544	115
	Panel E
			control Cav2.3 lat			pre-incubation Cav2.3 lat
		Distance from AZ	Mean	SEM	N	Mean	SEM	N
	AZ	0	1	0.115415	68	0.787004	0.075679	112
	50	50	0.818585	0.136431	68	0.517324	0.085107	112
	100	100	0.283994	0.083721	68	0.223106	0.05163	112
	150	150	0.250596	0.0853	68	0.070999	0.033114	112
	200	200	0.116892	0.048427	68	0.111564	0.0477	112
