# Supplementary material for: GABAB receptor auxiliary subunits modulate Cav2.3-mediated release from medial habenula terminals
Source: eLife. 2021 Apr 29;10:e68274. doi: 10.7554/eLife.68274 (PMC8121548; doi:10.7554/eLife.68274)
Supplement: Supplementary file 1. — Gmax is the maximal conductance density. *Gmax was significantly increased in KCTD8-transfected cells compared with Control (p=0.0340, one-way ANOVA with Tukey post hoc test); Vrev is the reversal potential; V0.5 act is the potential at which current density was half-maximal; Kα is the slope factor. [file elife-68274-supp1.docx]

**Supplementary File 1 for:**

**GABAB receptor auxiliary subunits modulate Cav2.3-mediated release from medial habenula terminals**

Authors: Pradeep Bhandari1, David Vandael1, Diego Fernandez-Fernandez2, Thorsten Fritzius2, David Kleindienst1, Cihan Önal1, Jacqueline Montanaro1, Martin Gassmann2, Peter Jonas1, Akos Kulik3,4, Bernhard Bettler2, Ryuichi Shigemoto1*, Peter Koppensteiner1*

Affiliations: 1Institute of Science and Technology (IST) Austria, 3400 Klosterneuburg, Austria 2Department of Biomedicine, University of Basel, 4056 Basel, Switzerland 3Institute of Physiology II, Faculty of Medicine, 4BIOSS Centre for Biological Signalling Studies, University of Freiburg, 79104 Freiburg, Germany

*Corresponding Authors: [ryuichi.shigemoto@ist.ac.at](mailto:ryuichi.shigemoto@ist.ac.at) and [peter.koppensteiner@ist.ac.at](mailto:peter.koppensteiner@ist.ac.at)

|  | **Control (n = 14)** | **KCTD8 (n = 10)** | **KCTD12b (n = 8)** |
| --- | --- | --- | --- |
| **Gmax (nS/pF)** | 0.75 ± 0.10 | 1.17 ± 0.12 * | 0.91 ± 0.15 |
| **Vrev (mV)** | 63.48 ± 3.08 | 66.5 ± 3.00 | 60.55 ± 3.84 |
| **V0.5 act (mV)** | -2.54 ± 2.28 | -3.93 ± 1.64 | -2.46 ± 1.78 |
| **Kα** | 8.01 ± 1.33 | 7.15 ± 1.03 | 7.05 ± 1.77 |

**Supplementary Table 1:**

Parameters of the Boltzmann fit shown in Figure 8C. Gmax is the maximal conductance density. * Gmax was significantly increased in KCTD8-transfected cells compared with Control (P = 0.0340, one-way ANOVA with Tukey post hoc test); Vrev is the reversal potential; V0.5 act is the potential at which current density was half-maximal; Kα is the slope factor
